# Supplementary material for: Community perceptions and practices of treatment seeking for childhood pneumonia: a mixed methods study in a rural district, Ghana
Source: BMC Public Health. 2016 Aug 22;16(1):848. doi: 10.1186/s12889-016-3513-z (PMC4994405; doi:10.1186/s12889-016-3513-z)
Supplement: Additional file 1: — Community perceptions of pneumonia Data set. (XLS 311 kb) [file 12889_2016_3513_MOESM1_ESM.xls]

## Sheet: Sheet1
q1fever	q2fever	q3fever	q3pnuemo	q4give	q4others	q5whyso	q6others	q8hsaf	q10hmdo	q11pneum	q11fever	q12pneum	q12fever	q14whyso	q18whydo	q19fever	q20heapn	q21fever	q23whate	q24canpp	q26capld	q27howca	q33wypai	q34wdyss	q35whgtc	q36whwmi	q37whdyt	q38whbch	q39whcmi	q40whdy	q48sex	q49age	q50numch	q51relig	q52educ	q53ethni	q54mstat	q55occup	q49age2
yes	no	no	no	yes	NA	i have t	NA	same day	did not	no	yes	no	no	na	na	no	no	na	na	na	na	88	yes	new drug	they’re	proximit	friends/	nothing	nothing	no one	female	65	2	christia	none	ga-dangm	widowed	unemploy	5
yes	no	no	no	no	NA	no money	NA	same day	did not	don't kn	don't kn	don't kn	don't kn	that is	na	yes	no	na	na	na	na	88	yes	new drug	they’re	availabi	grand pa	nothing	nothing	no one	female	19	1	none	none	ga-dangm	married	unemploy	1
no	no	yes	no	yes	NA	to help	NA	same day	3 days	no	no	no	no	i have t	to see i	yes	no	na	na	na	na	88	yes	because	they’re	availabi	my husba	nothing	financia	no one	female	25	2	christia	none	ga-dangm	married	unemploy	2
yes	yes	don't kn	don't kn	no	NA	don’t kn	NA	same day	same day	no	no	don't kn	don't kn	missing/	na	yes	no	na	na	na	na	88	yes	new drug	they’re	proximit	my husba	nothing	financia	no one	female	56	9	christia	none	ga-dangm	married	unemploy	5
yes	yes	no	no	yes	NA	to help	NA	same day	next day	no	no	no	no	i have t	na	yes	no	na	na	na	na	88	yes	because	they’re	proximit	other re	nothing	nothing	no one	female	70	7	christia	none	ga-dangm	widowed	unemploy	5
yes	no	yes	no	yes	NA	don’t kn	NA	same day	same day	no	no	no	no	to help	na	yes	no	na	na	na	na	88	yes	because	prompt t	availabi	other re	nothing	financia	no one	female	79	5	christia	none	ga-dangm	married	unemploy	5
yes	no	yes	no	yes	NA	to help	NA	same day	did not	don't kn	don't kn	no	no	that is	na	yes	no	na	na	na	na	88	yes	because	they’re	proximit	my husba	nothing	nothing	no one	female	21	2	christia	none	ga-dangm	married	unemploy	1
yes	yes	yes	no	yes	NA	to help	NA	same day	3 days	don't kn	don't kn	no	no	to help	na	yes	no	na	na	na	na	88	yes	because	prompt t	availabi	myself	money wi	financia	no one	female	22	1	christia	none	ga-dangm	divorced	unemploy	1
yes	yes	yes	no	no	NA	no money	NA	same day	same day	no	no	don't kn	don't kn	don’t kn	na	yes	no	na	na	na	na	88	yes	because	prompt t	proximit	grand pa	nothing	if distr	no one	female	28	4	traditio	none	ga-dangm	seperate	unemploy	2
yes	yes	yes	no	no	NA	others	NA	same day	did not	no	no	no	no	to help	na	no	no	na	na	na	na	88	yes	because	proximit	availabi	my husba	nothing	nothing	no one	female	33	2	christia	none	ga-dangm	married	unemploy	2
yes	yes	no	no	yes	NA	to help	NA	same day	next day	no	no	no	no	to help	na	yes	no	na	na	na	na	88	yes	because	they’re	proximit	my husba	nothing	(other)	no one	female	24	1	christia	none	ga-dangm	married	unemploy	1
yes	yes	no	no	no	NA	no money	NA	same day	same day	no	no	no	no	i have t	na	no	no	na	na	na	na	88	yes	because	prompt t	if the d	grand pa	nothing	if distr	no one	female	45	7	christia	none	ga-dangm	married	unemploy	4
yes	yes	yes	no	no	NA	i have t	NA	same day	did not	no	no	no	no	child’s	na	no	no	na	na	na	na	88	yes	it will	they’re	proximit	my husba	nothing	nothing	no one	female	85	7	christia	none	ewe	widowed	unemploy	5
yes	yes	yes	no	no	NA	don’t kn	NA	3 days	3 days	don't kn	don't kn	don't kn	don't kn	i have t	financia	no	no	na	na	na	na	88	yes	because	proximit	proximit	my husba	nothing	financia	no one	female	28	2	christia	none	ewe	married	unemploy	2
yes	yes	yes	no	no	NA	no money	NA	same day	7 days	no	no	don't kn	don't kn	don’t kn	to see i	yes	no	na	na	na	na	88	yes	new drug	prompt t	proximit	other re	nothing	nothing	no one	female	30	2	christia	none	ewe	married	unemploy	2
yes	yes	yes	no	yes	NA	to help	NA	same day	next day	no	no	no	no	i have t	to see i	yes	no	na	na	na	na	88	yes	because	prompt t	availabi	my husba	money wi	financia	no one	female	25	2	christia	none	ewe	married	unemploy	2
yes	no	yes	no	no	NA	to help	NA	same day	same day	no	no	no	no	child’s	to see i	yes	no	na	na	na	na	88	yes	because	prompt t	availabi	my husba	nothing	financia	no one	female	21	4	none	none	ewe	married	unemploy	1
yes	no	yes	no	yes	NA	to help	NA	same day	same day	no	no	no	no	to help	na	no	no	na	na	na	na	88	yes	because	prompt t	availabi	myself	nothing	financia	no one	female	45	10	none	none	ewe	married	unemploy	4
yes	no	yes	no	yes	NA	to help	NA	same day	3 days	don't kn	don't kn	don't kn	don't kn	that is	financia	no	no	na	na	na	na	88	yes	new drug	prompt t	proximit	grand pa	money wi	financia	no one	female	25	3	christia	none	ewe	married	unemploy	2
yes	yes	yes	no	yes	NA	to help	NA	same day	next day	don't kn	don't kn	don't kn	don't kn	to help	na	yes	no	na	na	na	na	88	yes	because	they’re	availabi	my husba	nothing	nothing	no one	female	25	5	muslim	none	northern	married	unemploy	2
yes	no	yes	no	yes	NA	to help	NA	same day	3 days	no	no	yes	no	to help	na	yes	yes	no	take the	yes	yes	99	yes	because	they’re	availabi	my husba	money wi	financia	no one	female	28	3	muslim	none	northern	married	unemploy	2
yes	no	yes	no	no	NA	don’t kn	NA	3 days	3 days	don't kn	don't kn	don't kn	don't kn	i have t	na	no	no	na	na	na	na	88	yes	it will	they’re	proximit	other re	nothing	financia	no one	female	26	2	muslim	none	other sp	married	unemploy	2
yes	yes	yes	no	no	NA	no money	NA	same day	next day	no	no	no	no	don’t kn	to see i	no	no	na	na	na	na	88	yes	new drug	proximit	proximit	other re	nothing	nothing	no one	female	40	4	christia	none	ga-dangm	married	farmer	3
yes	no	no	no	yes	NA	don’t kn	NA	same day	same day	no	no	no	no	i have t	to see i	yes	no	na	na	na	na	88	yes	because	prompt t	proximit	other re	nothing	nothing	no one	female	26	5	christia	none	ga-dangm	married	farmer	2
yes	yes	yes	no	no	NA	don’t kn	NA	same day	same day	no	no	no	no	to help	na	no	no	na	na	na	na	88	uncertai	it will	they’re	proximit	other re	nothing	nothing	no one	female	32	6	christia	none	ga-dangm	married	farmer	2
no	no	no	no	no	NA	don’t kn	NA	same day	3 days	no	no	no	no	i have t	to see i	no	yes	don't kn	don't kn	don't kn	na	88	yes	it will	they’re	proximit	my husba	money wi	financia	herbalis	female	34	5	christia	none	ga-dangm	married	farmer	2
yes	no	yes	no	yes	NA	to help	NA	same day	3 days	no	no	no	no	that is	to see i	no	no	na	na	na	na	88	yes	new drug	proximit	proximit	other re	nothing	nothing	no one	male	48	3	none	none	ga-dangm	married	farmer	4
yes	yes	no	no	no	NA	to help	NA	same day	did not	no	no	no	no	child’s	na	no	yes	no	take the	yes	yes	99	yes	new drug	they’re	proximit	my husba	nothing	nothing	no one	female	53	8	christia	none	ga-dangm	seperate	farmer	4
yes	yes	yes	no	yes	NA	to help	NA	same day	3 days	no	no	no	no	that is	na	yes	no	na	na	na	na	88	yes	it will	reduce c	proximit	my husba	nothing	nothing	no one	female	42	8	christia	none	ga-dangm	married	farmer	3
yes	yes	no	no	no	NA	no money	NA	same day	did not	don't kn	don't kn	no	no	to help	na	yes	no	na	na	na	na	88	yes	new drug	reduce c	proximit	my husba	nothing	if i am	no one	female	34	5	christia	none	ga-dangm	married	farmer	2
yes	yes	no	no	no	NA	don’t kn	NA	same day	same day	no	no	no	no	to help	na	yes	yes	don't kn	take the	yes	yes	99	yes	because	they’re	availabi	my husba	nothing	nothing	no one	female	48	6	christia	none	ga-dangm	married	farmer	4
yes	no	yes	no	yes	NA	no money	NA	same day	7 days	don't kn	don't kn	don't kn	don't kn	that is	financia	no	no	na	na	na	na	88	yes	new drug	proximit	proximit	other re	nothing	nothing	anyone w	female	33	6	christia	none	ga-dangm	married	farmer	2
yes	no	yes	no	no	NA	don’t kn	NA	4 days	4 days	don't kn	don't kn	don't kn	don't kn	i have t	to see i	yes	yes	don't kn	don't kn	don't kn	na	88	yes	because	reduce c	proximit	other re	nothing	financia	no one	female	46	6	muslim	none	ga-dangm	married	farmer	4
yes	yes	no	no	no	NA	to help	NA	same day	3 days	no	no	don't kn	don't kn	to help	to see i	yes	no	na	na	na	na	88	yes	it will	proximit	proximit	other re	nothing	nothing	no one	female	50	4	christia	none	ga-dangm	divorced	farmer	4
yes	no	yes	no	no	NA	don’t kn	NA	same day	4 days	no	no	no	no	to help	financia	yes	no	na	na	na	na	88	yes	it will	they’re	availabi	my husba	nothing	financia	no one	female	60	9	christia	none	ga-dangm	married	farmer	5
yes	no	no	no	no	NA	to help	NA	same day	same day	don't kn	don't kn	don't kn	don't kn	that is	na	no	no	na	na	na	na	88	yes	because	prompt t	proximit	my husba	nothing	nothing	no one	female	30	4	christia	none	ga-dangm	married	farmer	2
yes	no	don't kn	don't kn	no	NA	don’t kn	NA	same day	4 days	no	no	no	no	i have t	to see i	no	no	na	na	na	na	88	yes	new drug	prompt t	availabi	my husba	nothing	nothing	no one	female	44	5	christia	none	ga-dangm	married	farmer	3
yes	yes	yes	no	yes	NA	to help	NA	same day	3 days	no	no	no	no	i have t	na	yes	no	na	na	na	na	88	yes	because	prompt t	availabi	other re	nothing	financia	no one	female	28	3	christia	none	ga-dangm	married	farmer	2
yes	no	no	no	no	NA	don’t kn	NA	same day	3 days	don't kn	don't kn	don't kn	don't kn	i have t	na	yes	no	na	na	na	na	88	yes	new drug	prompt t	availabi	my husba	money wi	financia	no one	female	75	4	christia	none	ga-dangm	widowed	farmer	5
yes	yes	yes	no	no	NA	don’t kn	NA	same day	same day	no	no	no	yes	to help	na	no	no	na	na	na	na	88	yes	new drug	they’re	availabi	friends/	nothing	financia	no one	female	41	3	muslim	none	ga-dangm	married	farmer	3
yes	no	don't kn	don't kn	no	NA	don’t kn	NA	same day	same day	don't kn	don't kn	don't kn	don't kn	to help	na	yes	no	na	na	na	na	88	yes	new drug	they’re	proximit	my husba	nothing	nothing	no one	female	25	1	muslim	none	ga-dangm	never m	farmer	2
yes	no	yes	no	yes	NA	child’s	NA	same day	5 days	no	no	no	no	child’s	to see i	no	no	na	na	na	na	88	yes	because	proximit	proximit	my husba	nothing	nothing	no one	female	40	4	muslim	none	ga-dangm	married	farmer	3
yes	yes	yes	no	yes	NA	to help	NA	same day	same day	don't kn	don't kn	don't kn	don't kn	to help	na	yes	no	na	na	na	na	88	yes	because	prompt t	availabi	my husba	nothing	financia	no one	female	26	3	muslim	none	ga-dangm	married	farmer	2
yes	yes	yes	no	yes	NA	to help	NA	same day	next day	no	yes	no	yes	i have t	na	yes	no	na	na	na	na	88	yes	previous	they’re	proximit	my husba	nothing	nothing	no one	female	30	5	muslim	none	ga-dangm	married	farmer	2
yes	no	yes	no	no	NA	don’t kn	NA	same day	same day	don't kn	don't kn	no	no	child’s	na	no	no	na	na	na	na	88	yes	because	prompt t	proximit	other re	nothing	nothing	no one	female	67	2	christia	none	ga-dangm	married	farmer	5
yes	yes	yes	no	no	NA	others	NA	same day	same day	don't kn	don't kn	don't kn	don't kn	to help	na	no	no	na	na	na	na	88	yes	because	they’re	availabi	my husba	nothing	nothing	no one	female	40	8	none	none	ga-dangm	married	farmer	3
yes	no	yes	no	yes	NA	to help	NA	same day	3 days	no	no	no	no	to help	na	no	no	na	na	na	na	88	yes	because	prompt t	availabi	myself	nothing	financia	no one	male	45	9	muslim	none	ga-dangm	married	farmer	4
yes	no	yes	no	no	NA	no money	NA	same day		don't kn	don't kn	don't kn	don't kn	don’t kn	financia	no	no	na	na	na	na	88	yes	new drug	prompt t	proximit	my husba	nothing	nothing	no one	female	40	6	muslim	none	ga-dangm	married	farmer	3
yes	yes	no	no	no	NA	no money	NA	same day	3 days	no	no	no	no	don’t kn	financia	no	no	na	na	na	na	88	yes	new drug	reduce c	proximit	my husba	nothing	if i am	no one	female	49	9	muslim	none	ga-dangm	married	farmer	4
yes	no	yes	no	no	NA	don’t kn	NA	same day	same day	no	no	don't kn	don't kn	to help	na	yes	no	na	na	na	na	88	yes	because	prompt t	availabi	my husba	nothing	financia	no one	female	35	4	christia	none	ga-dangm	married	farmer	3
yes	no	don't kn	don't kn	yes	NA	to help	NA	same day	next day	don't kn	don't kn	don't kn	don't kn	that is	na	no	no	na	na	na	na	88	yes	new drug	they’re	proximit	grand pa	nothing	financia	no one	female	34	missing/	christia	none	ga-dangm	married	farmer	2
yes	no	yes	no	yes	NA	to help	NA	same day	4 days	no	no	no	no	to help	na	no	no	na	na	na	na	88	yes	because	prompt t	availabi	grand pa	nothing	financia	no one	male	35	5	none	none	ga-dangm	married	farmer	3
yes	no	yes	no	no	NA	don’t kn	NA	same day	same day	don't kn	don't kn	don't kn	don't kn	to help	na	yes	no	na	na	na	na	88	yes	because	they’re	availabi	my husba	nothing	financia	no one	female	27	5	christia	none	ga-dangm	married	farmer	2
yes	no	yes	no	yes	NA	to help	NA	same day	3 days	no	no	no	no	to help	na	yes	no	na	na	na	na	88	yes	because	they’re	availabi	myself	nothing	financia	no one	male	32	3	christia	none	ga-dangm	married	farmer	2
yes	no	yes	no	yes	NA	to help	NA	same day	3 days	no	no	no	no	that is	na	no	no	na	na	na	na	88	yes	because	they’re	availabi	my husba	nothing	financia	no one	female	28	3	christia	none	ga-dangm	seperate	farmer	2
yes	yes	yes	no	yes	NA	to help	NA	same day	3 days	no	no	no	yes	to help	na	yes	no	na	na	na	na	88	yes	new drug	they’re	availabi	my husba	nothing	financia	no one	male	54	7	none	none	ga-dangm	married	farmer	4
yes	yes	no	no	no	NA	others	NA	same day	same day	no	no	no	no	child’s	na	yes	yes	don't kn	don't kn	don't kn	na	88	yes	because	prompt t	proximit	other re	nothing	if the d	no one	male	49	8	christia	none	ga-dangm	married	farmer	4
yes	yes	don't kn	don't kn	no	NA	don’t kn	NA	same day	same day	don't kn	don't kn	don't kn	don't kn	to help	na	yes	no	na	na	na	na	88	yes	new drug	they’re	proximit	grand pa	nothing	financia	no one	female	32	2	christia	none	ga-dangm	married	farmer	2
yes	yes	yes	no	no	NA	no money	NA	same day	same day	no	no	don't kn	don't kn	child’s	to see i	yes	no	na	na	na	na	88	yes	because	they’re	(other)	friends/	nothing	nothing	no one	female	42	3	traditio	none	ga-dangm	divorced	farmer	3
yes	no	don't kn	don't kn	no	NA	don’t kn	NA	2 days	next day	don't kn	don't kn	don't kn	don't kn	child’s	na	no	no	na	na	na	na	88	yes	because	prompt t	availabi	my husba	nothing	financia	no one	female	75	3	christia	none	ga-dangm	widowed	farmer	5
yes	yes	yes	no	yes	NA	don’t kn	NA	same day	3 days	no	no	no	no	child’s	to see i	yes	no	na	na	na	na	88	yes	because	they’re	availabi	my husba	nothing	financia	no one	female	46	5	christia	none	ga-dangm	married	farmer	4
yes	yes	yes	no	no	NA	don’t kn	NA	same day	4 days	no	no	no	no	child’s	na	yes	no	na	na	na	na	88	yes	because	prompt t	availabi	myself	nothing	financia	no one	female	30	2	christia	none	ga-dangm	married	farmer	2
yes	no	yes	no	no	NA	to help	NA	same day	3 days	no	no	no	no	that is	to see i	no	no	na	na	na	na	88	yes	new drug	prompt t	proximit	other re	nothing	nothing	no one	female	42	7	muslim	none	ga-dangm	married	farmer	3
yes	no	yes	no	yes	NA	to help	NA	same day	3 days	no	yes	no	no	that is	to see i	no	no	na	na	na	na	88	yes	new drug	prompt t	proximit	friends/	nothing	nothing	no one	female	25	2	christia	none	ga-dangm	married	farmer	2
yes	no	yes	no	yes	NA	no money	NA	same day	next day	don't kn	don't kn	don't kn	don't kn	don’t kn	to see i	no	no	na	na	na	na	88	yes	new drug	prompt t	proximit	other re	nothing	if i am	no one	female	25	2	christia	none	ga-dangm	married	farmer	2
yes	no	yes	no	no	NA	no money	NA	3 days	7 days	don't kn	don't kn	don't kn	don't kn	don’t kn	to see i	no	no	na	na	na	na	88	yes	because	prompt t	proximit	other re	nothing	nothing	no one	female	36	1	christia	none	ga-dangm	married	farmer	3
no	no	yes	no	yes	NA	to help	NA	same day	na	don't kn	don't kn	don't kn	don't kn	i have t	na	no	no	na	na	na	na	88	yes	new drug	they’re	availabi	my husba	nothing	financia	no one	female	48	6	traditio	none	akan	married	farmer	4
yes	no	no	no	yes	NA	to help	NA	same day	next day	don't kn	don't kn	no	no	to help	na	yes	no	na	na	na	na	88	yes	new drug	proximit	proximit	my husba	nothing	nothing	no one	female	32	3	christia	none	ewe	married	farmer	2
yes	yes	yes	no	yes	NA	to help	NA	same day	3 days	no	no	no	no	i have t	na	yes	no	na	na	na	na	88	yes	because	prompt t	availabi	my husba	nothing	financia	no one	female	42	7	christia	none	ewe	married	farmer	3
yes	yes	yes	no	yes	NA	to help	NA	same day	next day	no	no	no	no	i have t	na	yes	no	na	na	na	na	88	yes	because	they’re	availabi	myself	money wi	financia	no one	female	30	2	christia	none	ewe	married	farmer	2
yes	yes	yes	no	yes	NA	to help	NA	same day	next day	don't kn	don't kn	don't kn	don't kn	don’t kn	financia	yes	no	na	na	na	na	88	yes	because	reduce c	availabi	myself	money wi	financia	no one	female	25	1	christia	none	ewe	seperate	farmer	2
yes	no	yes	no	yes	NA	to help	NA	same day	next day	no	no	no	no	that is	financia	no	no	na	na	na	na	88	yes	because	proximit	availabi	my husba	if there	if distr	no one	female	20	5	christia	none	ewe	married	farmer	1
yes	yes	yes	no	yes	NA	others	NA	same day	5 days	no	no	no	no	i have t	to see i	no	yes	don't kn	don't kn	don't kn	na	88	yes	new drug	prompt t	proximit	my husba	nothing	nothing	no one	female	46	2	christia	none	ewe	divorced	farmer	4
yes	no	yes	no	yes	NA	to help	NA	same day	4 days	no	no	no	no	child’s	financia	yes	yes	no	don't kn	yes	yes	99	yes	because	they’re	proximit	my husba	nothing	financia	no one	female	40	7	none	none	ewe	married	farmer	3
yes	no	no	no	no	NA	that is	NA	same day	did not	no	no	no	no	don’t kn	financia	no	yes	don't kn	don't kn	don't kn	na	88	yes	because	they’re	proximit	other re	nothing	nothing	no one	female	30	1	christia	none	ewe	married	farmer	2
yes	no	yes	no	yes	NA	no money	RUB AND SHARE BUTTER	same day	next day	don't kn	don't kn	don't kn	don't kn	don’t kn	financia	no	no	na	na	na	na	88	yes	new drug	prompt t	proximit	my husba	nothing	nothing	no one	female	42	6	christia	none	ewe	married	farmer	3
yes	yes	yes	no	yes	NA	no money	NA	same day	4 days	no	no	no	no	don’t kn	financia	no	no	na	na	na	na	88	yes	new drug	reduce c	availabi	other re	nothing	if i am	no one	female	25	3	none	none	ewe	married	farmer	2
yes	no	yes	no	yes	NA	to help	NA	same day	next day	no	no	no	no	to help	na	yes	yes	don't kn	take the	yes	yes	99	yes	because	prompt t	(other)	my husba	nothing	(other)	no one	female	39	6	christia	none	ewe	married	farmer	3
yes	no	yes	no	yes	NA	to help	NA	same day	3 days	don't kn	don't kn	don't kn	don't kn	to help	na	no	no	na	na	na	na	88	yes	because	proximit	availabi	my husba	nothing	nothing	no one	female	38	6	christia	none	ewe	married	farmer	3
yes	yes	yes	no	no	NA	don’t kn	NA	same day	same day	don't kn	don't kn	don't kn	don't kn	to help	na	yes	no	na	na	na	na	88	yes	because	they’re	availabi	my husba	nothing	financia	no one	female	32	2	muslim	none	northern	married	farmer	2
yes	yes	no	no	no	NA	no money	NA	same day	next day	don't kn	don't kn	don't kn	don't kn	no money	na	yes	no	na	na	na	na	88	yes	because	they’re	proximit	my husba	nothing	nothing	no one	female	56	8	traditio	none	missing	married	farmer	5
no	no	yes	no	no	NA	to help	NA	same day	next day	no	no	don't kn	don't kn	that is	to see i	no	yes	don't kn	take the	yes	yes	99	yes	because	they’re	if the d	other re	nothing	nothing	no one	female	27	2	christia	none	ga-dangm	never m	artisan	2
yes	no	yes	no	yes	NA	to help	NA	same day	4 days	no	no	don't kn	don't kn	that is	financia	no	yes	don't kn	take the	don't kn	na	88	yes	new drug	prompt t	proximit	other re	nothing	if i am	no one	female	27	1	christia	none	ga-dangm	married	artisan	2
no	no	no	no	yes	NA	to help	NA	same day	did not	no	no	no	no	to help	na	no	no	na	na	na	na	88	yes	because	prompt t	proximit	my husba	nothing	nothing	no one	female	34	2	christia	none	ga-dangm	married	artisan	2
yes	no	yes	no	no	NA	no money	NA	same day	3 days	don't kn	don't kn	don't kn	don't kn	don’t kn	to see i	no	yes	don't kn	take the	yes	yes	99	yes	new drug	reduce c	proximit	other re	nothing	nothing	no one	female	30	1	christia	none	ewe	married	artisan	2
yes	yes	no	no	yes	NA	others	NA	same day	3 days	no	no	no	no	child’s	na	yes	no	na	na	na	na	88	yes	it will	proximit	proximit	my husba	nothing	nothing	no one	female	25	2	muslim	none	northern	married	artisan	2
yes	no	yes	no	yes	NA	i have t	NA	same day	did not	no	no	no	no	that is	na	no	no	na	na	na	na	88	yes	it will	they’re	proximit	my husba	nothing	nothing	no one	female	34	4	christia	none	ga-dangm	married	trader	2
yes	no	no	no	yes	NA	to help	NA	next day	next day	no	no	no	no	i have t	to see i	no	no	na	na	na	na	88	yes	because	prompt t	proximit	my husba	if the d	nothing	no one	female	25	2	christia	none	ga-dangm	married	trader	2
yes	yes	yes	no	yes	NA	to help	NA	same day	same day	don't kn	don't kn	don't kn	don't kn	to help	na	no	no	na	na	na	na	88	yes	because	they’re	proximit	other re	nothing	nothing	no one	female	65	6	christia	none	ga-dangm	seperate	trader	5
yes	yes	no	no	no	NA	to help	NA	same day	3 days	don't kn	don't kn	don't kn	don't kn	i have t	financia	yes	no	na	na	na	na	88	yes	new drug	reduce c	availabi	grand pa	if the d	financia	no one	female	29	4	christia	none	ga-dangm	married	trader	2
yes	yes	yes	no	yes	NA	to help	NA	same day	same day	don't kn	don't kn	don't kn	don't kn	to help	na	yes	no	na	na	na	na	88	yes	because	they’re	proximit	my husba	nothing	financia	no one	female	38	5	christia	none	ga-dangm	married	trader	3
yes	yes	don't kn	don't kn	no	NA	to help	NA	next day	next day	don't kn	don't kn	don't kn	don't kn	that is	na	no	yes	don't kn	don't kn	yes	yes	99	yes	new drug	they’re	availabi	friends/	other	nothing	no one	female	25	3	christia	none	ga-dangm	married	trader	2
yes	yes	yes	no	no	NA	that is	NA	same day	next day	no	no	no	no	to help	to see i	no	yes	don't kn	don't kn	don't kn	na	88	yes	because	prompt t	proximit	grand pa	nothing	nothing	no one	female	42	4	christia	none	ga-dangm	married	trader	3
no	no	no	no	no	NA	to help	NA	same day	did not	no	yes	no	no	to help	na	no	yes	yes	take the	yes	yes	99	yes	because	they’re	availabi	my husba	nothing	nothing	no one	female	45	5	christia	none	ga-dangm	married	trader	4
yes	yes	yes	no	no	NA	that is	NA	same day	5 days	don't kn	don't kn	don't kn	don't kn	child’s	to see i	yes	no	na	na	na	na	88	yes	because	they’re	availabi	my husba	nothing	financia	no one	female	35	5	christia	none	ga-dangm	married	trader	3
no	no	no	no	yes	NA	to help	NA	same day	next day	no	no	don't kn	don't kn	i have t	to see i	no	no	na	na	na	na	88	yes	new drug	proximit	proximit	other re	nothing	nothing	no one	female	35	6	christia	none	ga-dangm	married	trader	3
yes	yes	no	no	yes	NA	to help	NA	same day	2 days	no	no	no	no	i have t	to see i	no	yes	don't kn	don't kn	don't kn	na	88	yes	new drug	reduce c	proximit	my husba	nothing	financia	no one	female	31	5	christia	none	ga-dangm	married	trader	2
yes	yes	yes	no	yes	NA	to help	NA	same day	4 days	no	no	no	no	to help	to see i	no	no	na	na	na	na	88	yes	new drug	they’re	proximit	my husba	money wi	nothing	no one	female	28	2	traditio	none	ga-dangm	married	trader	2
yes	no	no	no	yes	NA	to help	NA	same day	3 days	don't kn	don't kn	don't kn	don't kn	to help	to see i	no	no	na	na	na	na	88	yes	because	they’re	proximit	my husba	nothing	financia	no one	female	50	5	christia	none	ga-dangm	married	trader	4
yes	no	no	no	no	NA	don’t kn	NA	same day	7 days	no	no	no	no	i have t	financia	no	no	na	na	na	na	88	yes	because	they’re	proximit	other re	nothing	nothing	no one	female	30	3	none	none	ga-dangm	divorced	trader	2
yes	no	yes	no	yes	NA	to help	NA	same day	next day	no	no	no	no	to help	to see i	no	no	na	na	na	na	88	yes	it will	they’re	proximit	myself	if the d	if distr	no one	female	22	3	christia	none	ga-dangm	married	trader	1
yes	yes	no	no	no	NA	no money	NA	same day	did not	no	no	no	no	no money	na	no	no	na	na	na	na	88	yes	new drug	prompt t	availabi	my husba	nothing	financia	no one	female	37	5	christia	none	ga-dangm	married	trader	3
yes	no	yes	no	yes	NA	to help	NA	same day	3 days	no	no	no	no	i have t	to see i	no	no	na	na	na	na	88	yes	new drug	proximit	proximit	grand pa	nothing	nothing	no one	female	27	5	christia	none	ga-dangm	married	trader	2
yes	no	yes	no	yes	NA	i have t	NA	same day	did not	don't kn	don't kn	don't kn	don't kn	child’s	na	yes	no	na	na	na	na	88	yes	because	they’re	proximit	my husba	nothing	nothing	no one	female	23	1	christia	none	ga-dangm	married	trader	1
yes	yes	yes	no	yes	NA	to help	NA	same day	3 days	no	no	no	no	to help	na	yes	no	na	na	na	na	88	yes	because	prompt t	availabi	my husba	nothing	financia	no one	female	39	4	muslim	none	ga-dangm	married	trader	3
yes	no	yes	no	yes	NA	to help	NA	same day	same day	don't kn	don't kn	don't kn	don't kn	to help	na	no	no	na	na	na	na	88	yes	new drug	prompt t	proximit	other re	nothing	nothing	no one	female	24	2	muslim	none	ga-dangm	married	trader	1
yes	yes	yes	no	yes	NA	to help	NA	same day	3 days	no	no	no	no	child’s	na	yes	no	na	na	na	na	88	yes	because	prompt t	proximit	other re	nothing	financia	no one	female	32	1	christia	none	ga-dangm	married	trader	2
yes	no	yes	no	yes	NA	no money	NA	same day	did not	no	no	no	no	that is	na	no	no	na	na	na	na	88	yes	new drug	prompt t	proximit	other re	nothing	nothing	no one	female	43	6	none	none	ga-dangm	married	trader	3
no	no	no	no	no	NA	don’t kn	NA	same day	same day	don't kn	don't kn	don't kn	don't kn	to help	na	yes	no	na	na	na	na	88	yes	because	they’re	(other)	my husba	nothing	nothing	no one	female	30	5	none	none	ga-dangm	married	trader	2
yes	no	no	no	yes	NA	others	NA	same day	3 days	no	no	no	no	child’s	na	no	no	na	na	na	na	88	yes	because	they’re	proximit	my husba	nothing	nothing	no one	female	30	6	christia	none	ga-dangm	married	trader	2
yes	no	no	no	no	NA	don’t kn	NA	same day	next day	no	no	no	no	i have t	financia	no	yes	don't kn	don't kn	don't kn	na	88	yes	because	prompt t	availabi	other re	money wi	financia	no one	female	70	6	christia	none	ga-dangm	widowed	trader	5
yes	no	no	no	yes	NA	to help	NA	same day	3 days	no	no	no	no	child’s	na	yes	yes	no	take the	yes	yes	99	yes	new drug	prompt t	availabi	grand pa	nothing	financia	no one	female	30	3	christia	none	ga-dangm	seperate	trader	2
yes	yes	yes	no	yes	NA	don’t kn	NA	same day	same day	don't kn	don't kn	don't kn	don't kn	to help	na	yes	no	na	na	na	na	88	yes	because	prompt t	proximit	other re	nothing	nothing	no one	female	35	3	christia	none	ga-dangm	married	trader	3
yes	no	no	no	yes	NA	to help	NA	same day	same day	no	yes	no	no	that is	na	yes	no	na	na	na	na	88	yes	new drug	they’re	availabi	my husba	nothing	nothing	no one	female	40	8	christia	none	ga-dangm	married	trader	3
no	yes	yes	no	no	NA	that is	NA	same day	same day	no	yes	no	no	i have t	to see i	yes	no	na	na	na	na	88	yes	new drug	they’re	(other)	my husba	nothing	nothing	no one	female	27	3	christia	none	ga-dangm	married	trader	2
yes	no	yes	no	no	NA	that is	NA	same day	did not	no	no	no	no	child’s	na	no	no	na	na	na	na	88	yes	because	they’re	availabi	myself	nothing	financia	no one	female	45	5	christia	none	ga-dangm	seperate	trader	4
yes	no	yes	no	no	NA	to help	NA	same day	3 days	no	yes	no	no	that is	to see i	no	yes	don't kn	don't kn	don't kn	na	88	yes	new drug	prompt t	proximit	other re	nothing	if i am	no one	female	48	4	christia	none	ga-dangm	married	trader	4
no	yes	no	no	no	NA	don’t kn	NA	same day	same day	no	no	no	no	i have t	na	no	yes	don't kn	take the	yes	yes	99	yes	new drug	they’re	proximit	my husba	nothing	financia	no one	female	28	3	christia	none	ga-dangm	married	trader	2
yes	yes	yes	no	yes	NA	to help	NA	same day	same day	don't kn	don't kn	don't kn	don't kn	that is	na	yes	no	na	na	na	na	88	yes	because	prompt t	availabi	my husba	nothing	financia	no one	female	21	1	christia	none	ga-dangm	married	trader	1
yes	yes	yes	no	yes	NA	don’t kn	NA	same day	3 days	no	no	no	no	to help	financia	yes	no	na	na	na	na	88	yes	because	they’re	proximit	my husba	if the d	financia	no one	female	40	7	christia	none	ewe	married	trader	3
yes	no	no	no	yes	NA	no money	NA	same day	did not	don't kn	don't kn	don't kn	don't kn	don’t kn	financia	no	no	na	na	na	na	88	yes	it will	reduce c	proximit	other re	nothing	if i am	no one	female	35	4	christia	none	ewe	married	trader	3
yes	no	yes	no	yes	NA	to help	NA	3 days	3 days	no	no	don't kn	don't kn	that is	na	no	yes	don't kn	don't kn	don't kn	na	88	yes	new drug	reduce c	proximit	other re	nothing	nothing	no one	female	30	6	christia	none	ewe	widowed	trader	2
no	no	no	no	yes	NA	to help	NA	same day	did not	no	no	no	no	no money	to see i	no	no	na	na	na	na	88	yes	new drug	prompt t	proximit	friends/	nothing	nothing	no one	female	50	1	christia	none	ewe	divorced	trader	4
yes	yes	yes	no	yes	NA	to help	NA	same day	next day	no	no	no	no	i have t	na	yes	no	na	na	na	na	88	yes	because	they’re	proximit	other re	nothing	(other)	no one	female	33	3	christia	none	ewe	married	trader	2
yes	yes	yes	no	no	NA	don’t kn	NA	next day	3 days	don't kn	don't kn	don't kn	don't kn	i have t	financia	no	no	na	na	na	na	88	yes	because	prompt t	proximit	other re	nothing	nothing	no one	female	32	5	muslim	none	other sp	married	trader	2
yes	no	yes	no	yes	NA	to help	NA	same day	next day	don't kn	don't kn	no	no	that is	to see i	no	no	na	na	na	na	88	yes	new drug	prompt t	proximit	other re	nothing	nothing	no one	female	26	2	muslim	none	other sp	married	trader	2
yes	yes	no	no	no	NA	to help	NA	same day	3 days	no	no	no	no	no money	to see i	yes	no	na	na	na	na	88	yes	because	prompt t	availabi	myself	nothing	financia	no one	female	25	1	christia	none	ga-dangm	married	apprenti	2
yes	no	no	no	yes	NA	to help	NA	same day	3 days	no	yes	no	no	i have t	to see i	yes	yes	don't kn	don't kn	don't kn	na	88	yes	new drug	they’re	proximit	my husba	if the d	if i am	no one	female	28	2	muslim	none	ga-dangm	married	artisan	2
yes	no	no	no	no	NA	don’t kn	NA	same day	3 days	don't kn	don't kn	no	no	to help	financia	no	no	na	na	na	na	88	yes	because	reduce c	proximit	my husba	nothing	nothing	neighbou	female	30	3	christia	none	ga-dangm	married	artisan	2
yes	no	don't kn	don't kn	yes	NA	to help	NA	same day	next day	don't kn	don't kn	don't kn	don't kn	i have t	na	no	no	na	na	na	na	88	yes	new drug	prompt t	proximit	grand pa	nothing	financia	no one	female	30	3	none	none	ga-dangm	married	fisherma	2
yes	yes	yes	no	yes	NA	to help	NA	same day	3 days	no	no	no	no	child’s	na	no	no	na	na	na	na	88	yes	because	they’re	availabi	other re	nothing	financia	no one	female	28	2	christia	none	ga-dangm	married	fisherma	2
yes	yes	yes	no	no	NA	i have t	NA	same day	next day	don't kn	don't kn	don't kn	don't kn	no money	na	yes	no	na	na	na	na	88	yes	new drug	they’re	proximit	my husba	nothing	nothing	anyone w	female	30	3	muslim	none	ga-dangm	married	artisan	2
yes	no	yes	no	no	NA	don’t kn	NA	same day	same day	no	no	no	no	to help	na	yes	no	na	na	na	na	88	yes	because	prompt t	availabi	my husba	nothing	nothing	no one	female	19	1	christia	none	ga-dangm	married	artisan	1
yes	yes	yes	no	no	NA	don’t kn	NA	same day	same day	no	no	no	no	i have t	na	yes	no	na	na	na	na	88	yes	because	they’re	availabi	other re	nothing	financia	no one	female	28	1	muslim	none	northern	married	farmer	2
yes	no	yes	no	no	NA	to help	NA	same day	next day	no	no	no	no	to help	na	yes	no	na	na	na	na	88	yes	because	they’re	availabi	myself	nothing	financia	no one	female	22	3	christia	none	ga-dangm	divorced	trader	1
yes	yes	yes	no	yes	NA	to help	NA	same day	next day	don't kn	don't kn	don't kn	don't kn	that is	to see i	yes	no	na	na	na	na	88	yes	because	prompt t	proximit	my husba	nothing	nothing	no one	female	18	1	christia	none	ga-dangm	married	trader	1
yes	no	no	no	yes	NA	don’t kn	NA	same day	4 days	no	no	no	no	to help	na	yes	no	na	na	na	na	88	yes	because	they’re	availabi	other re	nothing	financia	no one	female	37	3	christia	none	ga-dangm	divorced	trader	3
yes	yes	yes	no	yes	NA	to help	NA	same day	next day	no	no	no	no	i have t	na	yes	no	na	na	na	na	88	yes	because	they’re	proximit	my husba	nothing	financia	no one	female	32	3	christia	none	ewe	married	trader	2
yes	yes	yes	no	yes	NA	to help	NA	same day	next day	don't kn	don't kn	don't kn	don't kn	to help	to see i	yes	no	na	na	na	na	88	yes	because	they’re	availabi	my husba	nothing	nothing	no one	female	32	3	christia	none	northern	married	trader	2
yes	no	yes	no	no	NA	that is	NA	same day	did not	don't kn	don't kn	don't kn	don't kn	to help	na	yes	no	na	na	na	na	88	yes	because	prompt t	availabi	my husba	nothing	financia	no one	female	22	1	christia	none	ga-dangm	married	artisan	1
no	no	yes	no	yes	NA	to help	NA	same day	same day	don't kn	don't kn	don't kn	don't kn	child’s	na	yes	no	na	na	na	na	88	yes	because	they’re	availabi	my husba	nothing	financia	no one	female	27	1	christia	none	ga-dangm	married	artisan	2
yes	yes	yes	no	yes	NA	to help	NA	same day	3 days	don't kn	don't kn	don't kn	don't kn	to help	na	yes	no	na	na	na	na	88	yes	because	they’re	availabi	myself	nothing	financia	no one	female	24	3	muslim	none	northern	married	trader	1
yes	yes	yes	no	yes	NA	to help	NA	same day	next day	no	yes	no	no	i have t	na	no	no	na	na	na	na	88	yes	new drug	they’re	proximit	my husba	nothing	if i am	no one	female	30	4	christia	none	ewe	married	trader	2
yes	yes	yes	no	yes	NA	to help	NA	same day	3 days	no	no	no	no	i have t	to see i	yes	no	na	na	na	na	88	yes	because	prompt t	availabi	my husba	nothing	financia	no one	female	38	3	christia	none	ewe	married	artisan	3
yes	yes	yes	no	yes	NA	to help	NA	same day	next day	no	no	no	no	to help	to see i	yes	no	na	na	na	na	88	yes	new drug	reduce c	proximit	other re	if the d	if i am	no one	female	30	3	christia	primary	ga-dangm	married	unemploy	2
yes	yes	yes	no	no	NA	to help	NA	same day	next day	don't kn	don't kn	don't kn	don't kn	that is	na	yes	yes	don't kn	take the	don't kn	na	88	yes	new drug	prompt t	proximit	my husba	nothing	nothing	no one	female	20	1	christia	primary	ga-dangm	never m	unemploy	1
yes	yes	no	no	no	NA	no money	NA	same day	did not	no	no	no	no	don’t kn	na	no	no	na	na	na	na	88	yes	it will	they’re	availabi	other re	nothing	(other)	no one	female	38	5	christia	primary	ga-dangm	married	unemploy	3
yes	no	no	no	yes	NA	to help	NA	same day	did not	no	yes	no	no	that is	na	no	yes	no	take the	yes	yes	99	yes	because	they’re	proximit	my husba	nothing	nothing	no one	female	25	2	christia	primary	ga-dangm	married	unemploy	2
no	yes	no	no	no	NA	to help	NA	same day	same day	no	no	don't kn	don't kn	i have t	na	yes	no	na	na	na	na	88	no	(others)	they’re	proximit	my husba	nothing	financia	no one	female	20	2	christia	primary	ga-dangm	married	unemploy	1
yes	no	no	no	yes	NA	to help	NA	same day	next day	no	no	don't kn	don't kn	i have t	na	yes	yes	don't kn	don't kn	don't kn	na	88	yes	new drug	proximit	availabi	other re	nothing	if the d	anyone w	female	37	3	missing	primary	ga-dangm	married	unemploy	3
yes	no	no	no	no	NA	to help	NA	same day	same day	don't kn	don't kn	don't kn	don't kn	child’s	na	no	no	na	na	na	na	88	yes	new drug	they’re	proximit	my husba	nothing	financia	no one	female	21	1	christia	primary	ga-dangm	married	unemploy	1
yes	no	yes	no	yes	NA	others	NA	same day	3 days	no	no	no	no	i have t	to see i	no	no	na	na	na	na	88	yes	new drug	reduce c	proximit	my husba	nothing	if i am	no one	female	40	3	christia	primary	ga-dangm	married	unemploy	3
yes	no	no	no	yes	NA	to help	NA	same day	3 days	don't kn	don't kn	don't kn	don't kn	to help	na	no	no	na	na	na	na	88	yes	new drug	proximit	proximit	other re	if the d	if distr	no one	female	32	4	christia	primary	ga-dangm	married	unemploy	2
no	no	no	no	yes	NA	to help	NA	same day	did not	don't kn	don't kn	don't kn	don't kn	i have t	na	no	yes	don't kn	don't kn	don't kn	na	88	yes	because	proximit	proximit	my husba	nothing	nothing	no one	female	22	2	christia	primary	ga-dangm	married	unemploy	1
yes	yes	no	no	yes	NA	no money	NA	same day	3 days	missing/	missing/	missing/	missing/	don’t kn	to see i	no	no	na	na	na	na	88	yes	new drug	reduce c	proximit	my husba	nothing	nothing	no one	female	23	2	christia	primary	ga-dangm	married	unemploy	1
yes	yes	yes	no	yes	NA	to help	NA	same day	next day	no	no	no	no	don’t kn	na	yes	no	na	na	na	na	88	yes	because	prompt t	availabi	grand pa	nothing	financia	no one	female	26	3	christia	primary	ga-dangm	married	unemploy	2
yes	yes	yes	no	no	NA	to help	NA	same day	same day	no	no	no	no	i have t	na	yes	no	na	na	na	na	88	yes	because	they’re	availabi	grand pa	nothing	nothing	no one	female	30	2	christia	primary	ga-dangm	married	unemploy	2
yes	no	yes	no	no	NA	don’t kn	NA	same day	4 days	no	no	no	no	i have t	to see i	no	no	na	na	na	na	88	yes	previous	they’re	proximit	other re	if the d	nothing	no one	female	30	3	none	primary	ga-dangm	married	unemploy	2
no	no	yes	no	no	NA	don’t kn	NA	same day	same day	don't kn	don't kn	don't kn	don't kn	to help	na	no	no	na	na	na	na	88	yes	new drug	they’re	proximit	my husba	nothing	if i am	no one	female	26	2	christia	primary	ga-dangm	married	unemploy	2
no	no	no	no	yes	NA	to help	NA	same day	next day	don't kn	don't kn	don't kn	don't kn	to help	to see i	yes	no	na	na	na	na	88	yes	because	prompt t	availabi	grand pa	nothing	financia	no one	female	19	1	christia	primary	ga-dangm	married	unemploy	1
no	no	don't kn	don't kn	yes	NA	to help	NA	same day	next day	don't kn	don't kn	don't kn	don't kn	that is	na	no	no	na	na	na	na	88	yes	new drug	they’re	availabi	my husba	nothing	financia	no one	female	18	1	christia	primary	ga-dangm	married	unemploy	1
yes	no	don't kn	don't kn	yes	NA	no money	NA	same day	same day	don't kn	don't kn	don't kn	don't kn	to help	na	yes	no	na	na	na	na	88	yes	because	reduce c	proximit	other re	nothing	financia	no one	female	30	2	christia	primary	ga-dangm	married	unemploy	2
yes	yes	yes	no	yes	NA	to help	NA	same day	next day	no	no	no	no	child’s	na	no	no	na	na	na	na	88	yes	new drug	they’re	availabi	my husba	nothing	financia	no one	female	22	1	christia	primary	ga-dangm	never m	unemploy	1
yes	no	yes	no	yes	NA	don’t kn	NA	same day	4 days	don't kn	don't kn	no	no	to help	na	yes	no	na	na	na	na	88	yes	because	they’re	availabi	myself	nothing	financia	no one	female	27	3	christia	primary	ga-dangm	divorced	unemploy	2
yes	yes	yes	no	yes	NA	to help	NA	same day	4 days	no	no	no	no	to help	na	yes	no	na	na	na	na	88	yes	because	they’re	availabi	myself	nothing	financia	no one	female	29	3	christia	primary	ga-dangm	widowed	unemploy	2
yes	no	yes	no	yes	NA	to help	NA	same day	same day	don't kn	don't kn	don't kn	don't kn	that is	na	yes	no	na	na	na	na	88	yes	because	they’re	availabi	grand pa	nothing	financia	no one	female	20	1	christia	primary	ga-dangm	married	unemploy	1
yes	no	yes	no	yes	NA	to help	NA	same day	next day	no	no	don't kn	don't kn	don’t kn	financia	no	no	na	na	na	na	88	yes	new drug	proximit	proximit	my husba	nothing	nothing	no one	female	32	2	christia	primary	akan	married	unemploy	2
yes	yes	yes	no	yes	NA	don’t kn	NA	same day	next day	yes	yes	yes	no	to help	financia	no	yes	yes	take the	yes	yes	77	yes	because	reduce c	availabi	my husba	money wi	financia	no one	female	19	1	christia	primary	ewe	married	unemploy	1
yes	yes	no	no	yes	NA	to help	NA	same day	did not	no	no	no	no	that is	na	no	no	na	na	na	na	88	yes	because	they’re	availabi	grand pa	nothing	nothing	no one	female	17	1	christia	primary	ewe	married	unemploy	1
yes	yes	yes	no	yes	NA	to help	NA	na	next day	no	no	no	no	to help	na	no	no	na	na	na	na	88	yes	new drug	they’re	availabi	other re	nothing	financia	no one	female	24	3	christia	primary	ewe	married	unemploy	1
yes	yes	don't kn	don't kn	no	NA	to help	NA	same day	same day	don't kn	don't kn	don't kn	don't kn	i have t	to see i	yes	no	na	na	na	na	88	yes	new drug	proximit	proximit	grand pa	nothing	financia	anyone w	female	22	1	none	primary	ewe	never m	unemploy	1
no	no	no	no	yes	NA	don’t kn	NA	next day	next day	no	no	don't kn	don't kn	i have t	na	no	no	na	na	na	na	88	yes	new drug	prompt t	proximit	other re	nothing	nothing	no one	female	30	6	christia	primary	ewe	married	unemploy	2
no	no	no	no	no	NA	to help	NA	same day	next day	no	no	no	no	to help	to see i	no	no	na	na	na	na	88	yes	it will	prompt t	availabi	my husba	nothing	financia	no one	female	21	2	christia	primary	ewe	married	unemploy	1
yes	no	yes	no	no	NA	others	NA	same day	same day	no	no	no	no	that is	to see i	no	no	na	na	na	na	88	yes	because	reduce c	proximit	my husba	nothing	nothing	no one	female	26	2	muslim	primary	northern	married	unemploy	2
no	no	yes	no	yes	NA	to help	NA	same day	next day	no	no	no	no	that is	financia	no	no	na	na	na	na	88	yes	new drug	proximit	proximit	other re	nothing	nothing	no one	female	20	1	muslim	primary	other sp	married	unemploy	1
no	no	don't kn	don't kn	yes	NA	to help	NA	same day	next day	don't kn	don't kn	don't kn	don't kn	i have t	na	no	no	na	na	na	na	88	yes	because	prompt t	proximit	other re	nothing	nothing	no one	male	58	4	christia	primary	ga-dangm	married	farmer	5
yes	yes	yes	no	yes	NA	to help	NA	same day	next day	don't kn	don't kn	don't kn	don't kn	that is	to see i	no	no	na	na	na	na	88	yes	new drug	reduce c	proximit	my husba	nothing	if distr	no one	female	39	2	christia	primary	ga-dangm	married	farmer	3
no	no	no	no	no	NA	to help	NA	same day	next day	don't kn	don't kn	don't kn	don't kn	na	to see i	yes	no	na	na	na	na	88	yes	previous	proximit	if the d	other re	nothing	financia	no one	male	31	2	christia	primary	ga-dangm	married	farmer	2
no	no	don't kn	don't kn	no	NA	don’t kn	NA	same day	same day	no	no	no	no	to help	na	no	no	na	na	na	na	88	yes	new drug	they’re	proximit	my husba	nothing	financia	no one	male	37	3	christia	primary	ga-dangm	married	farmer	3
yes	no	yes	no	yes	NA	to help	NA	same day	next day	don't kn	don't kn	no	no	child’s	to see i	yes	no	na	na	na	na	88	yes	because	they’re	availabi	my husba	nothing	financia	no one	female	40	4	christia	primary	ga-dangm	married	farmer	3
yes	no	yes	no	no	NA	to help	NA	same day	same day	no	no	no	no	to help	na	yes	no	na	na	na	na	88	yes	because	they’re	proximit	my husba	nothing	nothing	no one	male	28	5	none	primary	ga-dangm	married	farmer	2
yes	yes	no	no	no	NA	to help	NA	same day	did not	no	no	no	no	i have t	na	no	no	na	na	na	na	88	yes	because	they’re	availabi	my husba	nothing	nothing	no one	male	28	3	christia	primary	ga-dangm	married	farmer	2
no	yes	yes	no	yes	NA	to help	NA	same day	3 days	no	no	no	no	that is	financia	no	yes	no	take the	yes	yes	99	yes	new drug	reduce c	proximit	other re	nothing	if i am	no one	female	40	8	christia	primary	ga-dangm	widowed	farmer	3
yes	no	yes	no	yes	NA	to help	NA	same day	next day	don't kn	don't kn	don't kn	don't kn	i have t	to see i	yes	no	na	na	na	na	88	yes	because	prompt t	proximit	other re	nothing	nothing	no one	female	32	2	christia	primary	ga-dangm	married	farmer	2
yes	no	no	no	no	NA	others	NA	same day	did not	no	no	no	no	to help	na	no	no	na	na	na	na	88	yes	previous	they’re	proximit	my husba	nothing	nothing	no one	female	30	2	muslim	primary	ga-dangm	married	farmer	2
yes	yes	yes	no	yes	NA	to help	NA	same day	3 days	no	no	no	no	to help	na	yes	no	na	na	na	na	88	yes	because	prompt t	availabi	my husba	nothing	financia	no one	female	22	1	muslim	primary	ga-dangm	married	farmer	1
yes	no	yes	no	no	NA	others	NA	same day	same day	no	no	no	no	don’t kn	na	no	yes	don't kn	take the	don't kn	na	88	yes	new drug	prompt t	proximit	my husba	nothing	financia	no one	female	40	6	muslim	primary	ga-dangm	married	farmer	3
no	no	yes	no	yes	NA	to help	NA	same day	next day	don't kn	don't kn	no	no	that is	na	no	no	na	na	na	na	88	yes	new drug	they’re	proximit	my husba	nothing	nothing	no one	male	41	3	christia	primary	ga-dangm	married	farmer	3
yes	no	yes	no	yes	NA	that is	NA	same day	same day	no	no	don't kn	don't kn	to help	na	yes	no	na	na	na	na	88	yes	because	they’re	availabi	my husba	nothing	financia	no one	female	40	7	christia	primary	ga-dangm	married	farmer	3
yes	yes	yes	no	yes	NA	to help	NA	same day	same day	don't kn	don't kn	don't kn	don't kn	to help	na	yes	no	na	na	na	na	88	yes	because	prompt t	availabi	my husba	nothing	financia	no one	female	30	3	none	primary	ga-dangm	married	farmer	2
yes	yes	yes	no	no	NA	don’t kn	NA	same day	same day	don't kn	don't kn	don't kn	don't kn	to help	na	no	no	na	na	na	na	88	yes	because	prompt t	availabi	grand pa	nothing	financia	no one	female	20	1	christia	primary	ga-dangm	married	farmer	1
yes	no	yes	no	no	NA	others	NA	same day	same day	no	no	no	no	i have t	na	no	no	na	na	na	na	88	yes	because	reduce c	proximit	my husba	nothing	financia	no one	female	50	5	none	primary	ga-dangm	married	farmer	4
yes	yes	no	no	yes	NA	that is	NA	same day	same day	don't kn	don't kn	don't kn	don't kn	to help	na	yes	no	na	na	na	na	88	yes	because	prompt t	availabi	myself	nothing	financia	no one	female	56	7	christia	primary	ga-dangm	married	farmer	5
yes	no	yes	no	no	NA	don’t kn	NA	same day	same day	no	no	no	no	to help	na	yes	no	na	na	na	na	88	yes	new drug	prompt t	availabi	my husba	nothing	nothing	no one	female	38	7	christia	primary	ga-dangm	married	farmer	3
no	no	yes	no	no	NA	don’t kn	NA	same day	same day	no	no	no	no	that is	na	no	no	na	na	na	na	88	yes	new drug	they’re	proximit	my husba	nothing	financia	no one	female	30	2	christia	primary	ewe	married	farmer	2
yes	yes	no	no	no	NA	don’t kn	NA	same day	same day	don't kn	don't kn	don't kn	don't kn	i have t	na	yes	no	na	na	na	na	88	yes	new drug	proximit	availabi	other re	nothing	financia	no one	male	37	7	christia	primary	ewe	married	farmer	3
no	no	no	no	yes	NA	to help	NA	same day	3 days	no	no	no	no	i have t	to see i	yes	no	na	na	na	na	88	yes	because	prompt t	availabi	my husba	money wi	financia	no one	female	38	6	christia	primary	ewe	married	farmer	3
yes	yes	yes	no	yes	NA	to help	NA	same day	same day	don't kn	don't kn	don't kn	don't kn	no money	na	yes	no	na	na	na	na	88	yes	because	they’re	availabi	myself	nothing	financia	no one	female	26	5	christia	primary	ewe	divorced	farmer	2
yes	yes	yes	no	no	NA	to help	NA	same day	3 days	don't kn	don't kn	don't kn	don't kn	that is	na	yes	no	na	na	na	na	88	yes	because	prompt t	availabi	myself	nothing	financia	no one	female	23	4	christia	primary	ewe	married	farmer	1
yes	yes	yes	no	yes	NA	to help	NA	same day	next day	no	no	no	no	that is	financia	yes	no	na	na	na	na	88	yes	because	they’re	availabi	my husba	money wi	financia	no one	female	45	8	christia	primary	ewe	married	farmer	4
yes	yes	yes	no	yes	NA	to help	NA	same day	same day	no	no	no	no	that is	na	yes	no	na	na	na	na	88	yes	because	prompt t	proximit	my husba	nothing	nothing	no one	female	65	2	christia	primary	ewe	married	farmer	5
yes	yes	yes	no	no	NA	to help	NA	same day	3 days	don't kn	don't kn	don't kn	don't kn	to help	na	yes	no	na	na	na	na	88	yes	because	proximit	availabi	my husba	nothing	nothing	no one	female	32	5	christia	primary	ewe	married	farmer	2
yes	no	yes	no	no	NA	don’t kn	NA	same day	same day	don't kn	don't kn	don't kn	don't kn	to help	na	no	no	na	na	na	na	88	yes	new drug	they’re	proximit	my husba	nothing	nothing	no one	female	33	4	christia	primary	ewe	married	farmer	2
yes	no	yes	no	yes	NA	to help	NA	same day	3 days	no	no	no	no	that is	to see i	yes	yes	no	take the	yes	yes	99	yes	new drug	reduce c	proximit	my husba	nothing	nothing	no one	female	38	3	christia	primary	ga-dangm	married	artisan	3
no	no	no	no	yes	NA	to help	NA	same day	next day	don't kn	don't kn	don't kn	don't kn	i have t	to see i	no	yes	don't kn	don't kn	don't kn	na	88	yes	because	reduce c	proximit	other re	nothing	if i am	no one	female	37	3	christia	primary	ga-dangm	married	artisan	3
yes	no	don't kn	don't kn	yes	NA	to help	NA	next day	3 days	no	no	no	no	to help	na	yes	no	na	na	na	na	88	yes	it will	prompt t	if the d	my husba	nothing	if distr	no one	female	28	3	christia	primary	ga-dangm	married	artisan	2
yes	no	yes	no	no	NA	to help	NA	same day	did not	no	no	don't kn	don't kn	that is	na	no	no	na	na	na	na	88	yes	because	they’re	proximit	friends/	nothing	nothing	no one	female	32	5	christia	primary	ga-dangm	married	artisan	2
yes	no	yes	no	yes	NA	to help	NA	same day	7 days	don't kn	don't kn	don't kn	don't kn	that is	to see i	no	yes	don't kn	don't kn	don't kn	na	88	yes	new drug	prompt t	proximit	other re	nothing	financia	no one	female	30	1	christia	primary	ga-dangm	married	artisan	2
yes	no	yes	no	no	NA	no money	NA	same day	3 days	no	no	no	no	don’t kn	financia	no	no	na	na	na	na	88	yes	new drug	proximit	proximit	friends/	nothing	nothing	no one	male	36	5	christia	primary	ga-dangm	married	artisan	3
yes	no	yes	no	no	NA	others	NA	same day	same day	no	no	no	no	i have t	na	yes	yes	no	take the	yes	yes	99	yes	it will	prompt t	if the d	other re	nothing	nothing	no one	female	19	1	christia	primary	ga-dangm	married	artisan	1
yes	yes	yes	no	no	NA	to help	NA	same day	same day	don't kn	don't kn	don't kn	don't kn	that is	to see i	no	no	na	na	na	na	88	yes	new drug	proximit	proximit	my husba	nothing	nothing	no one	female	24	1	christia	primary	ewe	married	artisan	1
no	no	yes	no	no	NA	to help	NA	next day	next day	don't kn	don't kn	don't kn	don't kn	that is	to see i	no	no	na	na	na	na	88	yes	new drug	reduce c	proximit	my husba	nothing	nothing	no one	female	39	4	christia	primary	ga-dangm	married	trader	3
yes	no	no	no	yes	NA	to help	NA	same day	3 days	no	no	no	no	i have t	na	yes	no	na	na	na	na	88	yes	because	they’re	availabi	other re	nothing	financia	no one	female	43	7	christia	primary	ga-dangm	married	trader	3
yes	no	don't kn	don't kn	yes	NA	to help	NA	3 days	3 days	no	no	no	no	i have t	financia	yes	no	na	na	na	na	88	yes	new drug	prompt t	proximit	other re	nothing	nothing	no one	female	27	2	christia	primary	ga-dangm	married	trader	2
no	no	no	no	no	NA	no money	NA	same day	same day	no	no	no	no	that is	na	no	yes	yes	take the	yes	yes	99	yes	because	reduce c	availabi	grand pa	nothing	nothing	no one	female	52	8	christia	primary	ga-dangm	married	trader	4
yes	no	yes	no	yes	NA	to help	NA	same day	next day	no	no	no	no	that is	to see i	yes	no	na	na	na	na	88	yes	new drug	proximit	availabi	other re	money wi	financia	no one	female	30	5	christia	primary	ga-dangm	seperate	trader	2
yes	yes	yes	no	yes	NA	to help	NA	same day	3 days	no	no	no	no	i have t	to see i	yes	yes	don't kn	take the	yes	yes	99	yes	because	they’re	proximit	myself	nothing	(other)	no one	female	27	4	christia	primary	ga-dangm	married	trader	2
no	no	no	no	yes	NA	others	COKE (HOT ONE)	same day	same day	no	no	no	no	no money	na	no	no	na	na	na	na	88	yes	new drug	they’re	proximit	friends/	nothing	nothing	family/a	female	32	5	christia	primary	ga-dangm	married	trader	2
yes	no	no	no	no	NA	don’t kn	NA	same day	same day	no	no	no	no	to help	na	yes	no	na	na	na	na	88	yes	new drug	77	proximit	my husba	nothing	nothing	no one	female	31	5	christia	primary	ga-dangm	married	trader	2
yes	yes	yes	no	yes	NA	i have t	NA	same day	next day	don't kn	don't kn	no	no	child’s	na	no	no	na	na	na	na	88	yes	because	reduce c	if the d	friends/	nothing	nothing	no one	female	23	3	christia	primary	ga-dangm	married	trader	1
no	no	no	no	no	NA	others	NA	same day	same day	no	no	no	no	others	na	no	no	na	na	na	na	88	yes	because	reduce c	proximit	grand pa	nothing	nothing	no one	female	50	6	christia	primary	ga-dangm	married	trader	4
yes	no	no	no	yes	NA	to help	NA	same day	3 days	no	no	no	no	that is	na	no	yes	no	take the	yes	yes	ASRAKU	yes	new drug	prompt t	proximit	other re	if the d	if distr	neighbou	female	59	0	christia	primary	ga-dangm	widowed	trader	5
yes	no	no	no	yes	NA	don’t kn	NA	same day	same day	no	no	no	no	to help	to see i	yes	no	na	na	na	na	88	yes	new drug	reduce c	proximit	my husba	nothing	financia	no one	female	40	2	christia	primary	ga-dangm	married	trader	3
no	no	yes	no	no	NA	to help	NA	same day	3 days	no	no	no	no	to help	na	no	no	na	na	na	na	88	yes	new drug	they’re	proximit	my husba	money wi	nothing	no one	female	38	4	christia	primary	ga-dangm	married	trader	3
yes	no	yes	no	yes	NA	don’t kn	NA	same day	3 days	no	no	no	no	i have t	na	no	no	na	na	na	na	88	yes	new drug	prompt t	proximit	other re	if the d	nothing	no one	female	22	3	christia	primary	ga-dangm	married	trader	1
yes	yes	no	no	yes	NA	to help	NA	same day	4 days	don't kn	don't kn	don't kn	don't kn	i have t	na	yes	yes	don't kn	don't kn	don't kn	na	88	yes	because	prompt t	proximit	other re	money wi	financia	no one	female	42	5	christia	primary	ga-dangm	seperate	trader	3
yes	no	no	no	yes	NA	to help	NA	same day	next day	don't kn	don't kn	don't kn	don't kn	to help	i notice	no	no	na	na	na	na	88	yes	because	reduce c	proximit	other re	nothing	nothing	no one	female	23	2	christia	primary	ga-dangm	married	trader	1
yes	no	yes	no	no	NA	to help	NA	same day	next day	don't kn	don't kn	don't kn	don't kn	that is	to see i	yes	no	na	na	na	na	88	yes	new drug	they’re	proximit	my husba	nothing	financia	no one	female	29	1	christia	primary	ga-dangm	married	trader	2
yes	yes	yes	no	yes	NA	to help	NA	same day	3 days	don't kn	don't kn	don't kn	don't kn	i have t	na	yes	no	na	na	na	na	88	yes	because	they’re	availabi	my husba	nothing	nothing	no one	female	25	2	christia	primary	ga-dangm	married	trader	2
yes	yes	no	no	no	NA	don’t kn	NA	same day	next day	no	no	don't kn	don't kn	i have t	to see i	yes	no	na	na	na	na	88	yes	new drug	they’re	if the d	other re	if the d	if distr	no one	female	40	5	christia	primary	ga-dangm	married	trader	3
yes	no	yes	no	yes	NA	to help	NA	same day	4 days	no	yes	no	no	that is	financia	no	yes	no	take the	yes	yes	99	yes	because	proximit	availabi	my husba	nothing	financia	no one	female	32	3	christia	primary	ga-dangm	married	trader	2
yes	yes	yes	no	yes	NA	to help	NA	same day	next day	don't kn	don't kn	don't kn	don't kn	that is	to see i	no	no	na	na	na	na	88	yes	new drug	proximit	availabi	other re	money wi	financia	no one	female	21	2	christia	primary	ga-dangm	married	trader	1
yes	yes	yes	no	no	NA	to help	NA	same day	next day	no	no	no	no	i have t	na	no	no	na	na	na	na	88	yes	because	they’re	proximit	my husba	nothing	nothing	no one	female	30	3	christia	primary	ga-dangm	married	trader	2
yes	no	yes	no	no	NA	others	NA	same day	3 days	don't kn	don't kn	don't kn	don't kn	that is	to see i	no	no	na	na	na	na	88	yes	because	they’re	proximit	other re	other	financia	no one	female	32	2	christia	primary	ga-dangm	married	trader	2
yes	no	yes	no	yes	NA	to help	BCO	same day	did not	no	no	no	no	child’s	na	yes	no	na	na	na	na	88	yes	because	prompt t	proximit	grand pa	nothing	nothing	no one	female	29	2	christia	primary	ga-dangm	married	trader	2
no	no	yes	no	no	NA	child’s	NA	same day	same day	don't kn	don't kn	don't kn	don't kn	to help	na	no	no	na	na	na	na	88	yes	because	they’re	availabi	my husba	nothing	financia	no one	female	27	2	christia	primary	ga-dangm	married	trader	2
yes	no	yes	no	yes	NA	to help	NA	same day	3 days	no	no	no	no	to help	na	yes	no	na	na	na	na	88	yes	because	they’re	availabi	my husba	nothing	financia	no one	female	27	3	christia	primary	ga-dangm	married	trader	2
yes	yes	yes	no	yes	NA	to help	NA	same day	same day	no	no	no	no	i have t	na	yes	no	na	na	na	na	88	yes	because	they’re	availabi	my husba	nothing	financia	no one	female	19	1	christia	primary	ga-dangm	married	trader	1
yes	no	yes	no	yes	NA	to help	NA	same day	next day	no	yes	no	no	that is	na	no	yes	no	take the	yes	yes	KOHIO SE EMI	yes	new drug	proximit	proximit	other re	nothing	nothing	no one	female	40	6	christia	primary	ga-dangm	married	trader	3
no	no	no	no	yes	NA	to help	NA	same day	3 days	no	no	no	no	to help	to see i	no	no	na	na	na	na	88	yes	because	prompt t	proximit	other re	nothing	financia	no one	female	35	4	christia	primary	ga-dangm	seperate	trader	3
yes	no	yes	no	yes	NA	to help	NA	same day	next day	don't kn	don't kn	don't kn	don't kn	that is	financia	no	no	na	na	na	na	88	yes	because	proximit	availabi	my husba	nothing	financia	no one	female	44	7	christia	primary	akan	married	trader	3
yes	yes	yes	no	yes	NA	that is	NA	same day	3 days	no	no	don't kn	don't kn	to help	to see i	no	no	na	na	na	na	88	yes	because	they’re	availabi	grand pa	nothing	nothing	no one	female	23	1	christia	primary	ewe	married	trader	1
yes	yes	no	no	no	NA	don’t kn	NA	2 days	3 days	no	no	don't kn	don't kn	to help	financia	yes	no	na	na	na	na	88	yes	because	they’re	availabi	my husba	nothing	financia	no one	female	30	3	christia	primary	ewe	married	trader	2
yes	no	yes	no	no	NA	to help	NA	same day	did not	no	yes	no	no	child’s	na	no	no	na	na	na	na	88	yes	new drug	they’re	proximit	my husba	nothing	financia	no one	female	28	2	none	primary	ewe	married	trader	2
yes	no	yes	no	yes	NA	to help	NA	same day	3 days	no	no	no	no	missing/	financia	no	no	na	na	na	na	88	yes	it will	they’re	availabi	other re	nothing	financia	no one	female	26	3	christia	primary	ewe	married	trader	2
yes	yes	yes	no	yes	NA	to help	NA	same day	next day	no	no	don't kn	don't kn	i have t	to see i	no	yes	don't kn	don't kn	don't kn	na	88	yes	new drug	proximit	proximit	other re	nothing	financia	no one	female	27	missing/	christia	primary	ewe	married	trader	2
yes	no	yes	no	yes	NA	to help	NA	same day	next day	no	no	no	no	that is	to see i	no	no	na	na	na	na	88	yes	because	proximit	proximit	my husba	nothing	if i am	no one	female	28	3	christia	primary	ewe	married	trader	2
yes	yes	yes	no	yes	NA	to help	NA	same day	3 days	no	no	no	no	that is	to see i	no	no	na	na	na	na	88	yes	new drug	prompt t	availabi	friends/	other	financia	no one	female	30	6	christia	primary	ewe	divorced	trader	2
yes	no	yes	no	no	NA	don’t kn	NA	same day	same day	no	no	no	no	to help	na	no	no	na	na	na	na	88	yes	because	they’re	proximit	my husba	nothing	financia	no one	female	41	7	christia	primary	ewe	married	trader	3
yes	no	yes	no	yes	NA	to help	NA	same day	next day	don't kn	don't kn	don't kn	don't kn	i have t	to see i	yes	yes	don't kn	don't kn	yes	yes	99	yes	because	proximit	availabi	my husba	nothing	financia	no one	female	28	3	christia	primary	ewe	married	trader	2
yes	no	no	no	no	NA	no money	NA	same day	3 days	no	no	no	no	don’t kn	to see i	no	no	na	na	na	na	88	yes	new drug	prompt t	proximit	other re	nothing	nothing	no one	female	31	3	christia	primary	northern	married	trader	2
no	no	no	no	yes	NA	no money	NA	same day	next day	no	no	no	no	to help	financia	no	yes	don't kn	don't kn	don't kn	na	88	yes	new drug	reduce c	proximit	my husba	nothing	nothing	no one	female	24	2	christia	primary	northern	married	trader	1
yes	no	yes	no	no	NA	don’t kn	NA	same day	same day	no	no	no	no	i have t	na	yes	no	na	na	na	na	88	yes	new drug	they’re	proximit	other re	nothing	financia	no one	male	32	5	christia	primary	ga-dangm	married	fisherma	2
yes	no	yes	no	yes	NA	to help	NA	same day	next day	don't kn	don't kn	don't kn	don't kn	to help	na	no	yes	don't kn	don't kn	yes	yes	99	yes	because	reduce c	proximit	my husba	nothing	nothing	no one	female	27	1	christia	primary	ga-dangm	married	apprenti	2
yes	yes	yes	no	yes	NA	to help	NA	same day	next day	no	no	no	yes	that is	financia	yes	yes	don't kn	take the	don't kn	na	88	yes	because	they’re	proximit	grand pa	nothing	nothing	no one	female	23	1	christia	primary	ga-dangm	seperate	apprenti	1
no	no	yes	no	no	NA	to help	NA	same day	next day	don't kn	don't kn	no	no	to help	na	yes	no	na	na	na	na	88	yes	because	they’re	proximit	my husba	nothing	financia	no one	female	23	2	christia	primary	ga-dangm	married	apprenti	1
no	no	yes	no	no	NA	don’t kn	NA	same day	same day	don't kn	don't kn	don't kn	don't kn	don’t kn	na	no	no	na	na	na	na	88	yes	new drug	they’re	proximit	my husba	nothing	nothing	no one	female	27	5	christia	primary	ga-dangm	married	missing	2
no	yes	yes	no	yes	NA	to help	NA	same day	same day	no	yes	no	no	na	na	no	yes	don't kn	don't kn	don't kn	na	88	yes	previous	they’re	proximit	my husba	nothing	financia	no one	female	28	4	christia	primary	ga-dangm	married	artisan	2
yes	no	don't kn	don't kn	no	NA	don’t kn	NA	same day	same day	no	no	don't kn	don't kn	to help	na	yes	no	na	na	na	na	88	uncertai	(others)	they’re	proximit	other re	nothing	financia	no one	female	25	5	christia	primary	ga-dangm	married	artisan	2
yes	yes	yes	no	no	NA	don’t kn	NA	same day	7 days	don't kn	don't kn	don't kn	don't kn	to help	na	yes	no	na	na	na	na	88	yes	previous	they’re	proximit	my husba	nothing	financia	no one	female	30	2	christia	primary	ga-dangm	married	artisan	2
yes	yes	yes	no	no	NA	i have t	NA	same day	next day	no	no	no	no	child’s	na	yes	yes	don't kn	don't kn	don't kn	na	88	yes	because	proximit	availabi	myself	money wi	nothing	no one	male	48	missing/	christia	primary	ga-dangm	widowed	artisan	4
yes	yes	yes	no	no	NA	don’t kn	NA	same day	next day	don't kn	don't kn	don't kn	don't kn	i have t	to see i	yes	no	na	na	na	na	88	yes	new drug	they’re	proximit	my husba	nothing	financia	no one	female	27	3	christia	primary	northern	married	fisherma	2
yes	yes	yes	no	yes	NA	to help	NA	same day	next day	no	no	no	no	i have t	na	yes	no	na	na	na	na	88	uncertai	new drug	they’re	proximit	other re	nothing	financia	no one	female	30	3	christia	primary	ewe	married	artisan	2
yes	no	yes	no	yes	NA	don’t kn	NA	same day	same day	don't kn	don't kn	no	no	to help	na	yes	yes	no	take the	yes	yes	99	yes	because	they’re	availabi	my husba	nothing	financia	no one	female	28	3	christia	primary	ga-dangm	married	artisan	2
yes	yes	yes	no	yes	NA	to help	NA	same day	4 days	no	no	no	no	to help	na	yes	no	na	na	na	na	88	yes	because	they’re	availabi	myself	nothing	financia	no one	female	21	2	christia	primary	ga-dangm	married	artisan	1
yes	yes	yes	no	yes	NA	don’t kn	NA	same day	3 days	no	no	no	no	to help	na	yes	yes	don't kn	take the	yes	yes	99	yes	because	they’re	availabi	my husba	nothing	financia	no one	female	24	2	christia	primary	northern	married	artisan	1
yes	yes	yes	no	yes	NA	to help	NA	same day	next day	no	no	no	no	to help	to see i	yes	no	na	na	na	na	88	yes	because	reduce c	availabi	other re	money wi	financia	no one	female	48	4	christia	primary	ga-dangm	married	trader	4
yes	yes	yes	no	yes	NA	to help	NA	same day	next day	don't kn	don't kn	no	no	to help	na	yes	no	na	na	na	na	88	yes	because	prompt t	availabi	my husba	nothing	financia	no one	female	24	3	christia	primary	ga-dangm	married	trader	1
yes	no	yes	no	yes	NA	to help	NA	same day	5 days	no	no	no	no	child’s	to see i	no	no	na	na	na	na	88	yes	because	they’re	availabi	my husba	nothing	financia	no one	female	18	1	christia	primary	ga-dangm	never m	trader	1
yes	no	no	no	yes	NA	to help	NA	same day	3 days	don't kn	don't kn	no	no	to help	to see i	yes	no	na	na	na	na	88	yes	because	prompt t	proximit	myself	nothing	financia	no one	female	27	1	christia	primary	ga-dangm	divorced	trader	2
yes	no	yes	no	no	NA	don’t kn	NA	same day	3 days	don't kn	don't kn	no	no	i have t	to see i	yes	no	na	na	na	na	88	yes	because	they’re	availabi	my husba	nothing	financia	no one	female	20	1	christia	primary	ga-dangm	married	trader	1
yes	yes	yes	no	yes	NA	to help	NA	same day	3 days	no	no	no	no	i have t	na	yes	no	na	na	na	na	88	yes	because	they’re	availabi	my husba	nothing	financia	no one	female	32	5	christia	primary	ga-dangm	married	trader	2
yes	yes	yes	no	yes	NA	to help	NA	same day	same day	don't kn	don't kn	don't kn	don't kn	i have t	financia	yes	no	na	na	na	na	88	yes	because	they’re	availabi	my husba	nothing	nothing	no one	female	34	2	christia	primary	ga-dangm	married	trader	2
yes	yes	yes	no	no	NA	don’t kn	NA	same day	4 days	no	no	no	no	to help	na	yes	no	na	na	na	na	88	yes	because	prompt t	availabi	grand pa	nothing	financia	no one	female	35	4	christia	primary	ga-dangm	married	trader	3
yes	yes	yes	no	yes	NA	to help	NA	same day	3 days	no	no	no	no	i have t	na	yes	no	na	na	na	na	88	yes	because	prompt t	availabi	my husba	nothing	financia	no one	female	25	3	christia	primary	ewe	married	trader	2
yes	yes	yes	no	yes	NA	to help	NA	same day	3 days	don't kn	don't kn	don't kn	don't kn	to help	na	yes	no	na	na	na	na	88	yes	because	prompt t	availabi	grand pa	money wi	financia	no one	female	35	8	muslim	primary	northern	married	trader	3
yes	no	yes	no	yes	NA	don’t kn	NA	same day	same day	no	no	no	no	i have t	to see i	yes	no	na	na	na	na	88	yes	because	they’re	availabi	my husba	nothing	financia	no one	female	33	3	christia	primary	ga-dangm	married	artisan	2
yes	no	don't kn	don't kn	yes	NA	to help	NA	same day	3 days	don't kn	don't kn	don't kn	don't kn	to help	na	yes	no	na	na	na	na	88	yes	because	prompt t	availabi	my husba	nothing	financia	no one	female	23	1	muslim	primary	ga-dangm	married	artisan	1
yes	no	yes	no	yes	NA	to help	NA	same day	same day	don't kn	don't kn	don't kn	don't kn	to help	na	yes	no	na	na	na	na	88	yes	because	they’re	availabi	my husba	nothing	financia	no one	female	21	1	christia	primary	ga-dangm	married	artisan	1
yes	yes	yes	no	no	NA	to help	NA	same day	same day	don't kn	don't kn	don't kn	don't kn	i have t	na	no	no	na	na	na	na	88	yes	because	prompt t	availabi	my husba	nothing	financia	no one	female	30	2	christia	primary	ga-dangm	married	artisan	2
yes	no	yes	no	no	NA	don’t kn	NA	same day	same day	don't kn	don't kn	don't kn	don't kn	i have t	to see i	no	no	na	na	na	na	88	yes	new drug	they’re	proximit	other re	nothing	financia	no one	female	20	2	christia	primary	ewe	married	trader	1
yes	no	no	no	yes	NA	to help	NA	same day	next day	don't kn	don't kn	don't kn	don't kn	na	na	yes	no	na	na	na	na	88	yes	new drug	they’re	proximit	my husba	nothing	financia	no one	female	32	3	christia	primary	ewe	married	trader	2
yes	no	no	no	yes	NA	to help	NA	same day	same day	don't kn	don't kn	no	no	that is	na	no	yes	don't kn	don't kn	don't kn	na	88	yes	new drug	prompt t	proximit	other re	nothing	nothing	no one	female	26	1	christia	jss/midd	ga-dangm	married	unemploy	2
yes	no	yes	no	yes	NA	to help	NA	same day	same day	no	no	no	no	i have t	na	no	yes	no	take the	yes	yes	99	yes	new drug	they’re	proximit	my husba	nothing	financia	no one	female	23	1	christia	jss/midd	ga-dangm	married	unemploy	1
yes	yes	yes	no	no	NA	to help	NA	same day	same day	no	no	no	no	to help	na	no	yes	don't kn	don't kn	don't kn	na	88	yes	because	they’re	availabi	other re	if the d	if i am	no one	female	18	1	christia	jss/midd	ga-dangm	married	unemploy	1
yes	yes	yes	no	yes	NA	to help	NA	same day	did not	no	no	no	no	na	na	no	no	na	na	na	na	88	yes	because	they’re	availabi	friends/	nothing	nothing	no one	female	23	1	christia	jss/midd	ga-dangm	married	unemploy	1
yes	yes	yes	no	yes	NA	to help	NA	same day	next day	don't kn	don't kn	don't kn	don't kn	to help	to see i	yes	no	na	na	na	na	88	yes	because	proximit	availabi	other re	nothing	if distr	no one	female	21	2	christia	jss/midd	ga-dangm	married	unemploy	1
no	no	no	no	no	NA	to help	NA	same day	3 days	don't kn	don't kn	no	no	i have t	to see i	no	yes	don't kn	take the	yes	yes	99	yes	because	prompt t	availabi	myself	money wi	financia	no one	female	30	3	christia	jss/midd	ga-dangm	married	unemploy	2
yes	no	no	no	yes	NA	to help	NA	same day	3 days	don't kn	don't kn	don't kn	don't kn	that is	na	yes	no	na	na	na	na	88	yes	because	they’re	availabi	my husba	nothing	financia	no one	female	22	1	christia	jss/midd	ga-dangm	married	unemploy	1
yes	yes	no	no	yes	NA	don’t kn	NA	same day	7 days	no	no	no	no	to help	na	yes	yes	don't kn	don't kn	don't kn	na	88	yes	new drug	they’re	proximit	my husba	nothing	nothing	no one	female	21	2	christia	jss/midd	ga-dangm	married	unemploy	1
yes	no	yes	no	no	NA	to help	NA	same day	3 days	no	no	no	no	that is	to see i	no	yes	don't kn	don't kn	don't kn	na	88	yes	new drug	prompt t	proximit	my husba	nothing	nothing	no one	female	22	2	christia	jss/midd	ga-dangm	married	unemploy	1
yes	yes	no	no	yes	NA	to help	NA	same day	same day	no	no	no	no	to help	na	yes	yes	no	take the	yes	yes	99	yes	new drug	they’re	proximit	my husba	nothing	nothing	no one	female	48	7	christia	jss/midd	ga-dangm	married	unemploy	4
yes	yes	no	no	no	NA	to help	NA	same day	2 days	no	no	no	no	child’s	to see i	yes	yes	yes	take the	yes	yes	99	yes	because	they’re	proximit	my husba	nothing	nothing	no one	female	25	2	christia	jss/midd	ga-dangm	divorced	unemploy	2
yes	yes	yes	no	yes	NA	to help	NA	same day	3 days	don't kn	don't kn	don't kn	don't kn	that is	na	yes	no	na	na	na	na	88	yes	it will	they’re	availabi	other re	nothing	financia	no one	female	20	1	christia	jss/midd	ga-dangm	married	unemploy	1
no	yes	yes	no	yes	NA	don’t kn	SAMALIN JNR	same day	next day	no	no	no	no	to help	na	no	yes	no	take the	yes	yes	HOHA (ASTHMA)	no	(others)	they’re	if the d	other re	nothing	if distr	no one	female	33	2	christia	jss/midd	ga-dangm	married	unemploy	2
yes	yes	yes	no	yes	NA	to help	NA	same day	same day	don't kn	don't kn	don't kn	don't kn	that is	na	yes	yes	don't kn	don't kn	don't kn	na	88	yes	new drug	they’re	proximit	my husba	other	if i am	neighbou	female	22	2	christia	jss/midd	ga-dangm	married	unemploy	1
yes	yes	yes	no	yes	NA	to help	NA	same day	same day	no	yes	no	yes	to help	na	no	yes	don't kn	take the	yes	yes	99	yes	because	prompt t	availabi	my husba	nothing	financia	no one	female	25	3	christia	jss/midd	ga-dangm	married	unemploy	2
no	no	yes	no	yes	NA	to help	NA	same day	same day	don't kn	don't kn	no	no	that is	financia	no	yes	no	take the	yes	yes	99	yes	because	they’re	availabi	other re	money wi	nothing	no one	female	19	1	christia	jss/midd	akan	seperate	unemploy	1
no	no	no	no	no	NA	don’t kn	NA	same day	same day	no	no	no	no	i have t	financia	no	no	na	na	na	na	88	yes	it will	prompt t	proximit	my husba	nothing	financia	no one	female	24	3	christia	jss/midd	ewe	married	unemploy	1
yes	yes	yes	no	yes	NA	to help	NA	same day	next day	don't kn	don't kn	don't kn	don't kn	i have t	na	yes	no	na	na	na	na	88	no	(others)	they’re	proximit	grand pa	nothing	financia	no one	female	24	missing/	christia	jss/midd	ewe	never m	unemploy	1
yes	yes	yes	no	yes	NA	to help	NA	same day	3 days	no	no	don't kn	don't kn	i have t	na	no	no	na	na	na	na	88	yes	new drug	they’re	proximit	my husba	nothing	nothing	no one	female	28	3	christia	jss/midd	ewe	married	unemploy	2
yes	yes	yes	no	yes	NA	to help	NA	same day	same day	no	no	no	no	don’t kn	to see i	yes	yes	don't kn	take the	yes	yes	99	yes	because	they’re	availabi	my husba	nothing	(other)	no one	female	34	3	none	jss/midd	ewe	married	unemploy	2
yes	no	yes	no	yes	NA	to help	NA	na	next day	don't kn	don't kn	don't kn	don't kn	to help	na	yes	no	na	na	na	na	88	uncertai	because	they’re	proximit	other re	nothing	financia	anyone w	female	25	2	christia	jss/midd	ewe	married	unemploy	2
no	no	yes	no	no	NA	don’t kn	NA	same day	same day	don't kn	don't kn	no	no	to help	na	no	no	na	na	na	na	88	yes	previous	they’re	availabi	my husba	nothing	nothing	no one	female	31	1	christia	jss/midd	ewe	married	unemploy	2
yes	no	yes	no	yes	NA	to help	NA	same day	3 days	no	no	don't kn	don't kn	child’s	na	yes	no	na	na	na	na	88	yes	because	prompt t	availabi	myself	money wi	financia	no one	female	23	2	christia	jss/midd	ewe	married	unemploy	1
yes	no	yes	no	no	NA	to help	NA	same day	same day	don't kn	don't kn	don't kn	don't kn	that is	na	no	no	na	na	na	na	88	yes	new drug	they’re	proximit	my husba	nothing	financia	no one	female	18	1	none	jss/midd	ewe	married	unemploy	1
yes	yes	yes	no	yes	NA	to help	NA	same day	next day	no	no	no	no	i have t	to see i	no	no	na	na	na	na	88	yes	because	they’re	availabi	my husba	if the d	financia	no one	female	31	missing/	christia	jss/midd	ewe	married	unemploy	2
no	no	yes	no	no	NA	to help	NA	same day	same day	don't kn	don't kn	don't kn	don't kn	that is	na	no	yes	don't kn	don't kn	don't kn	na	88	yes	new drug	they’re	proximit	other re	nothing	financia	no one	female	44	4	christia	jss/midd	missing	married	unemploy	3
yes	no	yes	no	yes	NA	to help	NA	same day	same day	don't kn	don't kn	don't kn	don't kn	i have t	na	no	no	na	na	na	na	88	yes	new drug	prompt t	availabi	other re	nothing	financia	family/a	female	25	3	christia	jss/midd	ga-dangm	never m	farmer	2
yes	yes	no	no	no	NA	i have t	NA	same day	3 days	don't kn	don't kn	don't kn	don't kn	that is	na	no	no	na	na	na	na	88	yes	it will	prompt t	proximit	other re	if there	nothing	no one	male	31	3	christia	jss/midd	ga-dangm	married	farmer	2
yes	no	no	no	no	NA	to help	NA	same day	3 days	don't kn	don't kn	don't kn	don't kn	i have t	to see i	no	no	na	na	na	na	88	yes	because	prompt t	proximit	my husba	money wi	nothing	no one	female	24	2	muslim	jss/midd	ga-dangm	married	farmer	1
no	no	no	no	no	NA	don’t kn	NA	same day	same day	no	no	no	no	to help	na	no	no	na	na	na	na	88	yes	because	reduce c	availabi	my husba	nothing	nothing	no one	female	26	3	christia	jss/midd	ga-dangm	married	farmer	2
yes	no	yes	no	yes	NA	don’t kn	NA	same day	next day	no	no	no	no	that is	to see i	no	no	na	na	na	na	88	yes	because	proximit	proximit	other re	nothing	financia	no one	female	38	10	christia	jss/midd	ga-dangm	married	farmer	3
no	no	yes	no	yes	NA	to help	NA	same day	next day	no	no	no	no	that is	financia	no	no	na	na	na	na	88	yes	new drug	reduce c	proximit	myself	nothing	nothing	no one	male	54	2	christia	jss/midd	ga-dangm	seperate	farmer	4
no	no	no	no	yes	NA	to help	NA	same day	next day	no	no	no	no	i have t	na	no	yes	no	take the	yes	yes	KASA HIO	yes	because	prompt t	proximit	the nurs	nothing	nothing	no one	female	40	6	christia	jss/midd	ga-dangm	married	farmer	3
no	no	no	no	yes	NA	to help	NA	same day	did not	no	no	no	no	to help	na	no	no	na	na	na	na	88	yes	because	they’re	proximit	my husba	nothing	financia	no one	male	27	4	christia	jss/midd	ga-dangm	married	farmer	2
yes	no	no	no	no	NA	to help	NA	same day	next day	no	no	don't kn	don't kn	i have t	to see i	no	no	na	na	na	na	88	yes	because	reduce c	proximit	other re	nothing	nothing	no one	female	38	5	christia	jss/midd	ga-dangm	married	farmer	3
yes	yes	yes	no	no	NA	to help	NA	same day	5 days	don't kn	don't kn	don't kn	don't kn	i have t	na	yes	no	na	na	na	na	88	yes	because	they’re	availabi	my husba	nothing	if distr	no one	male	42	6	christia	jss/midd	ga-dangm	married	farmer	3
yes	no	yes	no	no	NA	don’t kn	NA	same day	same day	no	no	no	no	i have t	na	no	no	na	na	na	na	88	yes	because	prompt t	availabi	my husba	nothing	nothing	no one	female	38	6	christia	jss/midd	ga-dangm	married	farmer	3
yes	no	yes	no	no	NA	to help	NA	same day	3 days	no	no	no	no	that is	financia	yes	no	na	na	na	na	88	yes	because	they’re	availabi	my husba	money wi	financia	no one	female	30	3	christia	jss/midd	ga-dangm	married	farmer	2
yes	no	no	no	yes	NA	to help	NA	same day	3 days	no	no	no	no	i have t	to see i	no	yes	no	take the	yes	yes	99	yes	because	they’re	proximit	my husba	nothing	nothing	no one	female	50	6	christia	jss/midd	ga-dangm	widowed	farmer	4
yes	no	no	no	no	NA	to help	NA	same day	same day	no	no	no	no	missing/	na	no	no	na	na	na	na	88	yes	new drug	they’re	proximit	my husba	nothing	financia	no one	male	35	5	christia	jss/midd	ga-dangm	married	farmer	3
yes	yes	no	no	no	NA	don’t kn	NA	same day	same day	no	no	no	no	that is	to see i	no	yes	don't kn	take the	don't kn	na	88	yes	new drug	proximit	proximit	my husba	nothing	nothing	no one	male	61	9	christia	jss/midd	ewe	married	farmer	5
no	no	no	no	no	NA	to help	NA	same day	same day	don't kn	don't kn	don't kn	don't kn	i have t	na	yes	no	na	na	na	na	88	no	because	they’re	proximit	my husba	nothing	financia	no one	male	25	1	christia	jss/midd	ewe	married	farmer	2
yes	yes	yes	no	yes	NA	no money	NA	same day	3 days	no	no	don't kn	don't kn	don’t kn	to see i	no	no	na	na	na	na	88	yes	because	reduce c	proximit	grand pa	nothing	nothing	no one	male	26	1	christia	jss/midd	ewe	married	farmer	2
yes	yes	yes	no	yes	NA	to help	NA	same day	3 days	no	no	no	no	child’s	to see i	yes	no	na	na	na	na	88	yes	because	they’re	proximit	my husba	nothing	financia	no one	female	22	2	christia	jss/midd	ewe	married	farmer	1
yes	yes	yes	no	yes	NA	to help	NA	same day	4 days	don't kn	don't kn	don't kn	don't kn	that is	to see i	no	no	na	na	na	na	88	yes	new drug	reduce c	proximit	other re	nothing	nothing	no one	female	25	4	christia	jss/midd	ewe	married	farmer	2
yes	yes	yes	no	yes	NA	to help	NA	next day	next day	no	no	yes	no	that is	financia	no	no	na	na	na	na	88	yes	because	prompt t	availabi	myself	money wi	financia	no one	male	29	2	christia	jss/midd	ewe	married	farmer	2
yes	no	yes	no	yes	NA	to help	NA	same day	3 days	no	no	no	no	to help	na	no	no	na	na	na	na	88	yes	new drug	reduce c	proximit	other re	nothing	nothing	no one	female	35	4	christia	jss/midd	ewe	married	farmer	3
yes	no	yes	no	no	NA	don’t kn	NA	next day	next day	no	no	no	no	to help	financia	yes	yes	don't kn	take the	no	na	88	yes	because	reduce c	availabi	other re	money wi	nothing	no one	male	26	1	christia	jss/midd	ewe	married	farmer	2
no	no	no	no	no	NA	don’t kn	NA	na	same day	don't kn	don't kn	don't kn	don't kn	to help	na	no	yes	don't kn	don't kn	yes	yes	FAFADO	yes	because	proximit	proximit	my husba	nothing	nothing	no one	male	30	3	christia	jss/midd	ewe	married	farmer	2
yes	no	yes	no	no	NA	that is	NA	same day	next day	no	no	no	no	that is	to see i	no	yes	don't kn	don't kn	don't kn	na	88	yes	new drug	they’re	the love	my husba	nothing	financia	no one	female	39	6	christia	jss/midd	ewe	married	farmer	3
yes	no	yes	no	no	NA	don’t kn	NA	same day	na	no	no	no	no	i have t	na	yes	no	na	na	na	na	88	yes	new drug	they’re	availabi	my husba	nothing	financia	no one	male	69	3	christia	jss/midd	ewe	married	farmer	5
yes	no	yes	no	no	NA	to help	NA	same day	3 days	don't kn	don't kn	don't kn	don't kn	child’s	to see i	yes	yes	don't kn	don't kn	yes	yes	99	yes	because	they’re	availabi	my husba	nothing	financia	no one	male	34	2	christia	jss/midd	ewe	married	farmer	2
no	no	yes	no	no	NA	don’t kn	NA	same day	same day	no	no	don't kn	don't kn	that is	na	no	no	na	na	na	na	88	yes	because	they’re	if i hav	my husba	nothing	nothing	no one	female	35	3	none	jss/midd	ewe	married	farmer	3
no	no	no	no	yes	NA	to help	NA	na	same day	no	no	no	no	to help	na	no	yes	don't kn	don't kn	don't kn	na	88	yes	new drug	they’re	proximit	other re	nothing	financia	no one	female	40	3	christia	jss/midd	ewe	married	farmer	3
yes	no	yes	no	yes	NA	to help	NA	same day	5 days	don't kn	don't kn	no	no	to help	na	yes	no	na	na	na	na	88	yes	because	they’re	availabi	my husba	nothing	financia	no one	male	33	2	christia	jss/midd	ewe	married	farmer	2
yes	no	yes	no	no	NA	to help	NA	next day	3 days	no	no	no	no	i have t	na	no	yes	no	take the	yes	yes	99	yes	new drug	proximit	proximit	other re	nothing	nothing	no one	female	55	4	christia	jss/midd	ewe	divorced	farmer	5
yes	no	yes	no	yes	NA	to help	NA	same day	3 days	don't kn	don't kn	no	yes	that is	na	no	no	na	na	na	na	88	yes	new drug	proximit	availabi	my husba	nothing	financia	no one	female	24	3	christia	jss/midd	ewe	married	farmer	1
yes	yes	yes	no	yes	NA	to help	NA	same day	next day	no	no	no	no	that is	financia	no	no	na	na	na	na	88	yes	new drug	prompt t	proximit	other re	nothing	nothing	no one	female	30	5	christia	jss/midd	ga-dangm	married	artisan	2
yes	yes	yes	no	yes	NA	to help	NA	same day	next day	no	no	no	no	that is	na	yes	yes	don't kn	don't kn	don't kn	na	88	yes	new drug	proximit	proximit	other re	nothing	nothing	no one	female	29	2	christia	jss/midd	ga-dangm	married	artisan	2
yes	no	no	no	yes	NA	to help	NA	same day	did not	no	yes	no	no	to help	na	no	yes	yes	take the	yes	yes	99	yes	previous	they’re	availabi	my husba	nothing	nothing	no one	female	31	3	christia	jss/midd	ga-dangm	married	artisan	2
yes	no	yes	no	yes	NA	to help	NA	next day	did not	no	no	no	no	that is	na	yes	yes	no	take the	yes	yes	99	yes	because	they’re	if the d	my husba	nothing	nothing	no one	female	30	4	christia	jss/midd	ga-dangm	married	artisan	2
yes	yes	no	no	yes	NA	to help	NA	same day	did not	no	no	no	no	no money	to see i	no	yes	no	take the	yes	yes	99	yes	because	they’re	proximit	my husba	nothing	nothing	no one	female	30	1	christia	jss/midd	ga-dangm	married	artisan	2
no	no	yes	no	no	NA	don’t kn	NA	same day	same day	no	no	no	no	i have t	na	no	yes	no	take the	yes	yes	99	yes	because	reduce c	proximit	my husba	nothing	nothing	no one	male	39	6	christia	jss/midd	ga-dangm	married	artisan	3
yes	yes	yes	no	yes	NA	to help	PROCOLD	same day	3 days	no	no	no	no	don’t kn	financia	no	no	na	na	na	na	88	uncertai	don’t kn	proximit	proximit	grand pa	nothing	if distr	no one	female	27	2	christia	jss/midd	ga-dangm	married	artisan	2
yes	yes	yes	no	yes	NA	to help	NA	same day	3 days	no	no	no	no	that is	to see i	no	no	na	na	na	na	88	yes	new drug	prompt t	proximit	my husba	nothing	nothing	no one	female	25	1	christia	jss/midd	ga-dangm	married	artisan	2
yes	yes	yes	no	no	NA	to help	NA	same day	3 days	don't kn	don't kn	no	no	that is	to see i	no	yes	don't kn	don't kn	don't kn	na	88	yes	new drug	reduce c	proximit	my husba	nothing	if i am	evil per	female	23	1	christia	jss/midd	ga-dangm	married	artisan	1
yes	no	yes	no	yes	NA	to help	NA	same day	same day	no	no	no	no	i have t	na	yes	yes	don't kn	don't kn	don't kn	na	88	yes	new drug	they’re	proximit	my husba	nothing	financia	no one	female	26	4	christia	jss/midd	ga-dangm	married	artisan	2
yes	yes	no	no	yes	FRUITS	to help	FRUITS	same day	3 days	no	no	no	no	i have t	na	yes	no	na	na	na	na	88	yes	because	reduce c	proximit	grand pa	nothing	nothing	no one	female	26	2	christia	jss/midd	ga-dangm	married	artisan	2
no	no	no	no	no	NA	to help	NA	same day	same day	don't kn	don't kn	yes	no	i have t	na	no	yes	no	take the	yes	yes	99	yes	new drug	prompt t	proximit	my husba	if the d	(other)	no one	female	24	2	christia	jss/midd	ga-dangm	married	artisan	1
yes	no	no	no	yes	NA	to help	NA	same day	did not	no	no	no	no	i have t	na	no	no	na	na	na	na	88	yes	new drug	they’re	proximit	other re	nothing	nothing	no one	male	30	5	christia	jss/midd	ga-dangm	married	artisan	2
no	no	no	no	yes	NA	i have t	NA	same day	did not	no	no	don't kn	don't kn	i have t	na	no	yes	don't kn	take the	yes	yes	99	yes	because	they’re	(other)	other re	nothing	nothing	no one	female	25	2	christia	jss/midd	ga-dangm	married	artisan	2
yes	no	yes	no	yes	NA	to help	NA	same day	3 days	no	no	no	no	child’s	na	yes	yes	don't kn	take the	yes	yes	99	yes	because	they’re	availabi	other re	nothing	financia	no one	male	40	4	christia	jss/midd	ga-dangm	married	artisan	3
yes	no	no	no	yes	NA	to help	NA	same day	5 days	don't kn	don't kn	don't kn	don't kn	i have t	to see i	no	no	na	na	na	na	88	yes	because	prompt t	proximit	other re	money wi	financia	neighbou	female	36	3	christia	jss/midd	ga-dangm	married	artisan	3
yes	no	yes	no	no	NA	to help	NA	same day	next day	no	no	no	no	that is	to see i	no	no	na	na	na	na	88	yes	new drug	prompt t	proximit	my husba	nothing	if i am	no one	male	33	4	christia	jss/midd	ga-dangm	married	artisan	2
no	no	yes	no	yes	NA	to help	NA	same day	next day	don't kn	don't kn	don't kn	don't kn	to help	na	no	yes	don't kn	don't kn	don't kn	na	88	yes	because	prompt t	availabi	my husba	if the d	financia	no one	female	23	1	christia	jss/midd	ga-dangm	married	artisan	1
no	no	no	no	no	NA	to help	NA	same day	same day	don't kn	don't kn	no	no	i have t	na	yes	yes	don't kn	take the	yes	yes	99	uncertai	(others)	they’re	proximit	my husba	nothing	financia	no one	female	31	2	christia	jss/midd	ga-dangm	married	artisan	2
yes	yes	no	no	no	NA	others	NA	same day	2 days	no	no	no	no	that is	na	yes	no	na	na	na	na	88	yes	because	they’re	availabi	my husba	nothing	nothing	no one	female	34	2	christia	jss/midd	ga-dangm	married	artisan	2
yes	no	yes	no	yes	NA	no money	NA	same day	same day	no	no	no	no	don’t kn	na	no	yes	don't kn	don't kn	don't kn	na	88	yes	because	they’re	proximit	my husba	nothing	financia	no one	female	23	3	christia	jss/midd	ga-dangm	married	artisan	1
yes	no	yes	no	yes	NA	to help	NA	same day	next day	no	no	yes	no	that is	to see i	no	yes	no	take the	yes	yes	99	yes	new drug	reduce c	proximit	other re	nothing	if i am	no one	female	34	3	christia	jss/midd	akan	married	artisan	2
yes	no	no	no	no	NA	don’t kn	NA	same day	same day	no	no	no	no	to help	na	yes	no	na	na	na	na	88	yes	new drug	they’re	if the d	grand pa	nothing	nothing	no one	female	28	2	christia	jss/midd	ewe	married	artisan	2
yes	yes	yes	no	yes	NA	to help	NA	same day	2 days	don't kn	don't kn	don't kn	don't kn	that is	to see i	yes	yes	don't kn	don't kn	don't kn	na	88	yes	new drug	reduce c	proximit	my husba	nothing	if i am	family/a	male	34	2	christia	jss/midd	ewe	married	artisan	2
yes	no	yes	no	yes	NA	to help	NA	same day	next day	no	no	no	no	i have t	to see i	yes	yes	don't kn	don't kn	yes	yes	99	yes	new drug	proximit	proximit	other re	nothing	nothing	herbalis	male	24	1	christia	jss/midd	ewe	married	artisan	1
yes	no	yes	no	no	NA	to help	NA	same day	3 days	don't kn	don't kn	don't kn	don't kn	that is	to see i	no	no	na	na	na	na	88	yes	new drug	proximit	proximit	other re	nothing	if i am	no one	female	27	3	christia	jss/midd	ewe	married	artisan	2
yes	no	yes	no	yes	NA	to help	NA	same day	same day	no	no	no	no	that is	na	no	yes	don't kn	take the	yes	yes	99	yes	new drug	prompt t	proximit	other re	nothing	nothing	no one	female	39	5	christia	jss/midd	ewe	married	artisan	3
yes	no	no	no	yes	NA	to help	SEPTRIN	same day	next day	no	no	don't kn	don't kn	i have t	na	no	yes	yes	take the	yes	yes	99	yes	new drug	they’re	proximit	my husba	nothing	if distr	no one	female	34	3	christia	jss/midd	other sp	married	artisan	2
yes	no	yes	no	yes	NA	to help	NA	same day	3 days	no	no	no	no	that is	to see i	no	yes	no	take the	yes	yes	99	no	because	reduce c	proximit	my husba	if there	nothing	no one	female	29	2	christia	jss/midd	ga-dangm	married	trader	2
yes	no	yes	no	yes	NA	to help	NA	same day	3 days	don't kn	don't kn	don't kn	don't kn	that is	to see i	no	yes	don't kn	don't kn	don't kn	na	88	yes	new drug	reduce c	proximit	other re	nothing	(other)	no one	female	22	2	christia	jss/midd	ga-dangm	married	trader	1
yes	no	yes	no	yes	NA	to help	NA	same day	3 days	no	no	no	no	that is	to see i	no	no	na	na	na	na	88	yes	new drug	prompt t	proximit	my husba	nothing	if distr	no one	female	24	3	christia	jss/midd	ga-dangm	married	trader	1
yes	no	yes	no	no	NA	to help	NA	same day	3 days	no	no	no	no	i have t	to see i	yes	yes	don't kn	take the	yes	yes	99	yes	because	they’re	proximit	friends/	nothing	nothing	no one	female	30	2	christia	jss/midd	ga-dangm	married	trader	2
yes	no	yes	no	no	NA	that is	NA	same day	3 days	no	no	no	no	to help	financia	no	yes	yes	take the	yes	yes	99	yes	new drug	they’re	proximit	my husba	nothing	nothing	no one	female	23	2	christia	jss/midd	ga-dangm	married	trader	1
yes	no	yes	no	yes	NA	to help	NA	next day	did not	don't kn	don't kn	no	no	child’s	na	yes	no	na	na	na	na	88	yes	new drug	they’re	proximit	friends/	nothing	nothing	no one	female	23	2	christia	jss/midd	ga-dangm	married	trader	1
yes	yes	yes	no	yes	NA	to help	NA	same day	next day	no	yes	don't kn	don't kn	to help	to see i	no	no	na	na	na	na	88	yes	because	proximit	availabi	my husba	money wi	financia	no one	female	42	6	christia	jss/midd	ga-dangm	married	trader	3
yes	yes	yes	no	yes	NA	don’t kn	NA	same day	same day	no	no	no	no	i have t	financia	no	no	na	na	na	na	88	yes	new drug	they’re	proximit	my husba	nothing	financia	no one	female	31	3	christia	jss/midd	ga-dangm	married	trader	2
yes	yes	yes	no	no	NA	don’t kn	NA	same day	same day	no	no	no	no	that is	financia	no	no	na	na	na	na	88	yes	new drug	they’re	proximit	other re	nothing	nothing	no one	female	35	6	christia	jss/midd	ga-dangm	married	trader	3
yes	yes	yes	no	yes	NA	to help	NA	same day	next day	no	no	no	no	that is	na	yes	yes	don't kn	don't kn	don't kn	na	88	yes	new drug	prompt t	proximit	grand pa	nothing	nothing	no one	female	24	1	christia	jss/midd	ga-dangm	never m	trader	1
yes	no	yes	no	yes	NA	to help	NA	same day	next day	no	yes	don't kn	don't kn	that is	to see i	no	yes	don't kn	don't kn	don't kn	na	88	yes	it will	they’re	availabi	my husba	nothing	if distr	herbalis	female	28	4	christia	jss/midd	ga-dangm	married	trader	2
yes	yes	yes	no	yes	NA	to help	NA	same day	next day	no	no	no	no	that is	financia	no	no	na	na	na	na	88	yes	because	reduce c	availabi	my husba	money wi	financia	no one	female	30	2	christia	jss/midd	ga-dangm	married	trader	2
yes	no	yes	no	yes	NA	to help	NA	same day	did not	no	no	no	no	child’s	na	no	yes	don't kn	take the	yes	yes	99	yes	because	proximit	proximit	myself	money wi	financia	no one	female	27	3	christia	jss/midd	ga-dangm	married	trader	2
yes	no	no	no	no	NA	that is	NA	same day	4 days	no	no	no	no	that is	na	no	yes	don't kn	don't kn	don't kn	na	88	yes	because	proximit	proximit	my husba	nothing	if i am	no one	female	40	8	christia	jss/midd	ga-dangm	married	trader	3
yes	no	yes	no	yes	NA	to help	NA	same day	next day	no	no	don't kn	don't kn	that is	financia	yes	no	na	na	na	na	88	yes	because	proximit	availabi	other re	nothing	financia	no one	female	24	2	christia	jss/midd	ga-dangm	seperate	trader	1
yes	yes	yes	no	no	NA	to help	ABIDEC	same day	same day	don't kn	don't kn	don't kn	don't kn	na	na	no	no	na	na	na	na	88	yes	new drug	prompt t	if i hav	my husba	nothing	nothing	no one	female	32	1	christia	jss/midd	ga-dangm	married	trader	2
yes	yes	yes	no	yes	NA	to help	NA	next day	next day	no	no	no	no	that is	na	no	yes	yes	take the	yes	yes	99	yes	new drug	proximit	proximit	friends/	nothing	if distr	no one	female	43	1	christia	jss/midd	ga-dangm	seperate	trader	3
yes	yes	yes	no	yes	NA	to help	NA	same day	same day	don't kn	don't kn	don't kn	don't kn	to help	na	yes	yes	don't kn	don't kn	yes	yes	88	yes	new drug	they’re	availabi	other re	money wi	nothing	no one	female	19	1	christia	jss/midd	ga-dangm	seperate	trader	1
no	yes	yes	no	yes	NA	to help	NA	next day	next day	no	no	don't kn	don't kn	that is	to see i	no	yes	don't kn	don't kn	don't kn	na	88	yes	new drug	proximit	proximit	my husba	if the d	if distr	no one	female	35	4	christia	jss/midd	ga-dangm	married	trader	3
yes	no	no	no	no	NA	to help	NA	same day	did not	no	yes	no	no	child’s	na	yes	yes	no	take the	yes	yes	99	yes	new drug	prompt t	proximit	grand pa	nothing	nothing	no one	female	22	1	christia	jss/midd	ga-dangm	married	trader	1
yes	no	yes	no	yes	NA	to help	CAMOQUINE	same day	3 days	don't kn	don't kn	no	no	i have t	i notice	yes	yes	yes	take the	yes	yes	88	yes	because	they’re	availabi	other re	money wi	financia	no one	female	47	2	christia	jss/midd	ga-dangm	married	trader	4
yes	no	no	no	no	NA	to help	NA	same day	next day	don't kn	don't kn	no	no	i have t	to see i	no	yes	don't kn	take the	yes	yes	99	yes	because	reduce c	proximit	other re	nothing	nothing	no one	female	34	5	christia	jss/midd	ga-dangm	married	trader	2
yes	yes	yes	no	yes	NA	others	NA	same day	next day	no	no	no	no	to help	na	yes	yes	don't kn	take the	yes	yes	99	yes	because	they’re	availabi	my husba	nothing	financia	no one	female	38	4	christia	jss/midd	ga-dangm	married	trader	3
no	no	yes	no	yes	NA	to help	NA	same day	3 days	no	no	no	no	i have t	na	yes	no	na	na	na	na	88	yes	because	they’re	availabi	my husba	nothing	financia	no one	female	26	2	christia	jss/midd	ga-dangm	married	trader	2
yes	no	yes	no	no	NA	to help	NA	same day	next day	don't kn	don't kn	no	no	that is	to see i	no	no	na	na	na	na	88	yes	new drug	reduce c	proximit	other re	nothing	nothing	no one	female	34	3	christia	jss/midd	ga-dangm	married	trader	2
yes	no	yes	no	yes	NA	to help	NA	same day	same day	don't kn	don't kn	don't kn	don't kn	that is	na	no	no	na	na	na	na	88	yes	new drug	they’re	proximit	my husba	nothing	financia	no one	female	21	3	christia	jss/midd	ga-dangm	married	trader	1
yes	no	no	no	no	NA	to help	NA	same day	same day	no	no	don't kn	don't kn	others	to see i	no	no	na	na	na	na	88	yes	new drug	prompt t	availabi	other re	nothing	financia	no one	female	23	1	christia	jss/midd	ga-dangm	married	trader	1
yes	yes	yes	no	yes	NA	don’t kn	NA	same day	3 days	don't kn	don't kn	don't kn	don't kn	that is	financia	yes	no	na	na	na	na	88	yes	it will	proximit	if i hav	grand pa	money wi	nothing	no one	female	27	1	christia	jss/midd	ga-dangm	married	trader	2
yes	no	yes	no	yes	NA	to help	NA	same day	next day	no	no	no	no	don’t kn	financia	no	no	na	na	na	na	88	yes	because	proximit	proximit	my husba	if the d	if i am	no one	female	26	missing/	christia	jss/midd	ga-dangm	married	trader	2
no	no	no	no	no	NA	to help	NA	same day	3 days	no	no	no	no	that is	to see i	no	no	na	na	na	na	88	yes	new drug	proximit	if the d	my husba	nothing	if i am	no one	female	26	4	christia	jss/midd	ga-dangm	married	trader	2
yes	no	no	no	no	NA	to help	NA	next day	next day	no	no	no	no	i have t	na	no	no	na	na	na	na	88	yes	(others)	they’re	availabi	my husba	nothing	financia	no one	female	41	5	christia	jss/midd	ga-dangm	widowed	trader	3
yes	yes	no	no	yes	NA	to help	NA	same day	3 days	no	no	no	no	i have t	financia	no	yes	don't kn	don't kn	don't kn	na	88	yes	because	prompt t	availabi	my husba	money wi	financia	no one	female	42	4	christia	jss/midd	ga-dangm	married	trader	3
yes	no	don't kn	don't kn	no	NA	to help	NA	same day	3 days	no	no	no	no	i have t	na	no	no	na	na	na	na	88	yes	because	prompt t	proximit	my husba	nothing	if i am	no one	female	23	1	muslim	jss/midd	ga-dangm	married	trader	1
yes	no	no	no	no	NA	to help	NA	same day	3 days	no	no	don't kn	don't kn	i have t	to see i	no	yes	don't kn	take the	don't kn	na	88	yes	new drug	prompt t	proximit	other re	nothing	nothing	no one	female	40	3	christia	jss/midd	ga-dangm	married	trader	3
yes	no	yes	no	no	NA	to help	NA	same day	3 days	don't kn	don't kn	don't kn	don't kn	missing/	to see i	no	no	na	na	na	na	88	yes	new drug	prompt t	proximit	friends/	nothing	nothing	no one	female	27	3	christia	jss/midd	ga-dangm	married	trader	2
no	yes	no	no	no	NA	don’t kn	NA	same day	same day	don't kn	don't kn	don't kn	don't kn	i have t	na	no	no	na	na	na	na	88	yes	new drug	prompt t	proximit	my husba	nothing	nothing	no one	female	21	1	none	jss/midd	ga-dangm	married	trader	1
yes	no	yes	no	no	NA	don’t kn	NA	same day	3 days	no	no	no	no	to help	na	yes	no	na	na	na	na	88	yes	because	they’re	availabi	other re	nothing	financia	no one	female	32	4	christia	jss/midd	ga-dangm	married	trader	2
no	no	yes	no	no	NA	don’t kn	NA	same day	same day	no	no	don't kn	don't kn	to help	na	no	yes	don't kn	don't kn	no	na	88	yes	new drug	they’re	proximit	my husba	if the d	(other)	neighbou	male	29	2	christia	jss/midd	ga-dangm	married	trader	2
yes	no	don't kn	don't kn	no	NA	i have t	NA	same day	next day	don't kn	don't kn	don't kn	don't kn	i have t	na	yes	no	na	na	na	na	88	yes	new drug	they’re	proximit	my husba	if the d	financia	no one	female	22	1	christia	jss/midd	ga-dangm	married	trader	1
yes	no	yes	no	yes	NA	i have t	NA	same day	3 days	don't kn	don't kn	no	no	i have t	na	no	yes	yes	take the	yes	yes	99	yes	because	prompt t	availabi	my husba	nothing	financia	no one	female	55	4	christia	jss/midd	ga-dangm	married	trader	5
no	no	yes	no	yes	NA	to help	NA	same day	same day	no	no	don't kn	don't kn	to help	na	no	yes	don't kn	don't kn	don't kn	na	88	yes	because	prompt t	proximit	my husba	money wi	financia	no one	female	48	3	christia	jss/midd	ga-dangm	divorced	trader	4
yes	no	no	no	no	NA	to help	NA	same day	3 days	don't kn	don't kn	don't kn	don't kn	i have t	na	yes	no	na	na	na	na	88	yes	because	reduce c	availabi	other re	if the d	financia	no one	female	34	5	christia	jss/midd	ga-dangm	married	trader	2
no	no	no	no	no	NA	don’t kn	NA	same day	same day	no	no	no	no	to help	na	no	yes	no	don't kn	yes	yes	99	yes	because	prompt t	proximit	my husba	na	nothing	no one	female	38	3	christia	jss/midd	akan	married	trader	3
yes	yes	yes	no	no	NA	i have t	NA	same day	next day	don't kn	don't kn	don't kn	don't kn	to help	na	yes	yes	don't kn	take the	yes	yes	99	yes	new drug	they’re	proximit	my husba	nothing	financia	no one	female	49	4	christia	jss/midd	akan	married	trader	4
yes	yes	yes	no	no	NA	to help	NA	same day	same day	don't kn	don't kn	don't kn	don't kn	that is	na	no	no	na	na	na	na	88	yes	new drug	they’re	availabi	friends/	nothing	nothing	no one	female	31	5	christia	jss/midd	akan	married	trader	2
yes	yes	yes	no	yes	NA	to help	NA	same day	3 days	don't kn	don't kn	don't kn	don't kn	that is	to see i	yes	yes	don't kn	don't kn	don't kn	na	88	yes	new drug	proximit	proximit	other re	nothing	nothing	no one	female	32	4	christia	jss/midd	ewe	married	trader	2
yes	no	yes	no	yes	NA	to help	NA	next day	6 days	no	no	no	no	no money	na	no	yes	no	take the	yes	yes	99	yes	new drug	proximit	proximit	my husba	money wi	if distr	no one	female	20	1	christia	jss/midd	ewe	married	trader	1
yes	yes	yes	no	yes	NA	don’t kn	NA	same day	next day	don't kn	don't kn	no	no	to help	to see i	no	yes	yes	take the	yes	yes	99	yes	because	they’re	proximit	my husba	money wi	if distr	no one	female	33	5	christia	jss/midd	ewe	married	trader	2
yes	no	no	no	yes	NA	no money	NA	same day	2 days	no	no	no	no	don’t kn	to see i	no	no	na	na	na	na	88	yes	new drug	reduce c	proximit	my husba	nothing	nothing	no one	female	21	2	christia	jss/midd	ewe	married	trader	1
yes	no	no	no	no	NA	to help	NA	same day	next day	don't kn	don't kn	don't kn	don't kn	that is	to see i	no	no	na	na	na	na	88	yes	new drug	they’re	proximit	my husba	nothing	financia	no one	female	21	2	christia	jss/midd	ewe	married	trader	1
yes	yes	yes	no	yes	NA	to help	NA	next day	next day	no	no	no	no	i have t	to see i	no	no	na	na	na	na	88	yes	new drug	prompt t	proximit	other re	nothing	nothing	no one	female	30	4	christia	jss/midd	ewe	married	trader	2
no	no	no	no	yes	NA	to help	NA	same day	next day	don't kn	don't kn	no	no	that is	i notice	no	yes	don't kn	take the	yes	yes	99	yes	new drug	proximit	proximit	the nurs	if the d	if distr	no one	female	39	4	christia	jss/midd	ewe	married	trader	3
no	no	no	no	yes	NA	i have t	NA	same day	did not	don't kn	don't kn	don't kn	don't kn	na	na	yes	yes	don't kn	don't kn	don't kn	na	88	yes	new drug	reduce c	proximit	my husba	if there	nothing	no one	female	29	3	christia	jss/midd	ewe	married	trader	2
no	no	yes	no	yes	NA	to help	NA	same day	next day	don't kn	don't kn	don't kn	don't kn	that is	to see i	yes	no	na	na	na	na	88	yes	because	they’re	availabi	my husba	nothing	financia	no one	female	39	2	christia	jss/midd	ewe	married	trader	3
yes	no	yes	no	yes	NA	to help	NA	same day	3 days	don't kn	don't kn	don't kn	don't kn	i have t	financia	yes	no	na	na	na	na	88	yes	new drug	proximit	availabi	my husba	nothing	financia	no one	female	26	3	christia	jss/midd	ewe	married	trader	2
yes	yes	no	no	no	NA	to help	NA	same day	did not	no	no	no	no	that is	na	no	no	na	na	na	na	88	yes	because	they’re	proximit	my husba	nothing	nothing	no one	female	29	5	christia	jss/midd	ewe	married	trader	2
yes	no	yes	no	yes	NA	to help	NA	same day	5 days	no	yes	no	yes	child’s	financia	yes	no	na	na	na	na	88	yes	because	proximit	proximit	grand pa	nothing	financia	no one	female	19	missing/	christia	jss/midd	ewe	married	trader	1
yes	yes	yes	no	no	NA	i have t	NA	same day	did not	no	no	no	no	to help	financia	yes	no	na	na	na	na	88	yes	new drug	they’re	(other)	my husba	nothing	(other)	no one	female	25	3	christia	jss/midd	ewe	married	trader	2
yes	yes	yes	no	no	NA	to help	NA	same day	4 days	no	no	no	no	that is	to see i	no	no	na	na	na	na	88	yes	new drug	prompt t	proximit	other re	nothing	nothing	no one	female	48	2	christia	jss/midd	northern	seperate	trader	4
yes	no	no	no	yes	NA	to help	NA	same day	next day	don't kn	don't kn	don't kn	don't kn	i have t	na	no	yes	don't kn	don't kn	don't kn	na	88	yes	because	proximit	proximit	grand pa	if the d	financia	no one	female	26	2	christia	jss/midd	ga-dangm	married	civil se	2
yes	no	no	no	yes	NA	to help	NA	na	next day	don't kn	don't kn	don't kn	don't kn	that is	to see i	yes	yes	no	take the	yes	yes	99	yes	new drug	they’re	proximit	my husba	money wi	nothing	myself	male	46	4	christia	jss/midd	ga-dangm	married	civil se	4
no	no	yes	no	yes	NA	to help	NA	same day	next day	no	no	no	no	that is	to see i	yes	no	na	na	na	na	88	yes	new drug	proximit	availabi	myself	if there	financia	no one	male	43	6	christia	jss/midd	ga-dangm	married	civil se	3
no	no	no	no	no	NA	don’t kn	NA	same day	same day	no	no	no	no	to help	na	yes	yes	yes	take the	yes	yes	99	yes	because	they’re	(other)	my husba	nothing	nothing	no one	male	42	2	christia	jss/midd	akan	married	civil se	3
yes	no	no	no	yes	NA	i have t	NA	same day	3 days	no	no	don't kn	don't kn	to help	na	yes	no	na	na	na	na	88	yes	because	prompt t	availabi	my husba	nothing	financia	no one	female	25	1	christia	jss/midd	northern	married	civil se	2
yes	yes	yes	no	yes	NA	don’t kn	NA	same day	same day	don't kn	don't kn	don't kn	don't kn	to help	na	yes	no	na	na	na	na	88	yes	because	proximit	availabi	my husba	money wi	financia	no one	female	32	3	christia	jss/midd	ga-dangm	married	apprenti	2
yes	yes	yes	no	yes	NA	to help	NA	same day	same day	don't kn	don't kn	no	no	that is	to see i	yes	no	na	na	na	na	88	yes	because	they’re	availabi	my husba	nothing	financia	no one	female	19	1	christia	jss/midd	ga-dangm	married	apprenti	1
no	no	yes	no	yes	NA	to help	NA	same day	3 days	no	no	no	no	i have t	to see i	no	no	na	na	na	na	88	no	(others)	prompt t	proximit	myself	if the d	financia	no one	female	31	3	christia	jss/midd	ga-dangm	married	apprenti	2
yes	no	yes	no	yes	NA	to help	NA	same day	same day	don't kn	don't kn	don't kn	don't kn	that is	to see i	yes	no	na	na	na	na	88	yes	new drug	they’re	availabi	my husba	nothing	financia	evil per	female	23	2	christia	jss/midd	ga-dangm	married	apprenti	1
no	no	yes	no	yes	NA	to help	NA	next day	next day	no	no	no	no	that is	financia	no	yes	no	take the	yes	yes	99	yes	new drug	proximit	proximit	grand pa	nothing	if the d	no one	female	24	1	christia	jss/midd	ewe	seperate	apprenti	1
yes	no	yes	no	yes	NA	i have t	NA	same day	next day	don't kn	don't kn	don't kn	don't kn	to help	to see i	yes	no	na	na	na	na	88	yes	because	they’re	availabi	my husba	nothing	if distr	no one	female	40	3	christia	jss/midd	ewe	married	trader	3
yes	no	no	no	yes	NA	to help	NA	same day	2 days	no	no	no	no	i have t	to see i	yes	no	na	na	na	na	88	yes	because	prompt t	availabi	other re	nothing	financia	no one	female	32	3	christia	jss/midd	ga-dangm	seperate	trader	2
yes	no	yes	no	no	NA	don’t kn	NA	same day	same day	no	no	no	no	others	na	yes	yes	don't kn	don't kn	don't kn	na	88	yes	new drug	they’re	proximit	other re	nothing	financia	family/a	female	27	3	christia	jss/midd	ga-dangm	married	artisan	2
yes	yes	yes	no	yes	NA	don’t kn	NA	same day	same day	no	no	no	yes	to help	na	yes	no	na	na	na	na	88	yes	because	they’re	proximit	myself	money wi	financia	no one	male	41	4	christia	jss/midd	ga-dangm	married	artisan	3
no	no	no	no	yes	NA	to help	NA	same day	next day	don't kn	don't kn	no	no	i have t	to see i	no	yes	no	don't kn	yes	yes	SASABRO	yes	new drug	reduce c	if the d	friends/	if there	financia	no one	female	27	2	christia	jss/midd	akan	married	artisan	2
yes	yes	yes	no	no	NA	i have t	NA	same day	did not	no	no	no	no	that is	na	no	no	na	na	na	na	88	no	because	they’re	proximit	my husba	nothing	nothing	no one	male	35	3	christia	jss/midd	akan	married	other	3
yes	yes	yes	no	no	NA	to help	NA	next day	next day	no	no	no	no	to help	to see i	yes	yes	don't kn	take the	yes	yes	99	yes	because	they’re	availabi	other re	nothing	financia	no one	male	37	3	christia	jss/midd	ewe	married	artisan	3
yes	no	no	no	yes	NA	don’t kn	NA	next day	next day	don't kn	don't kn	don't kn	don't kn	to help	na	no	yes	no	take the	yes	yes	99	yes	it will	prompt t	proximit	other re	nothing	nothing	no one	male	58	9	christia	jss/midd	ga-dangm	married	other	5
yes	yes	yes	no	no	NA	to help	NA	same day	3 days	no	no	no	no	that is	i notice	yes	no	na	na	na	na	88	yes	because	prompt t	availabi	myself	nothing	financia	no one	female	26	2	christia	jss/midd	ga-dangm	married	trader	2
no	no	yes	no	no	NA	no money	NA	same day	3 days	no	no	no	no	to help	na	yes	no	na	na	na	na	88	yes	because	they’re	proximit	myself	nothing	nothing	no one	female	26	2	christia	jss/midd	ga-dangm	seperate	trader	2
yes	yes	yes	no	yes	NA	to help	NA	same day	2 days	no	no	no	no	i have t	na	yes	no	na	na	na	na	88	yes	because	they’re	availabi	my husba	nothing	financia	no one	female	20	1	christia	jss/midd	ga-dangm	divorced	trader	1
yes	yes	yes	no	yes	NA	to help	NA	same day	2 days	no	no	don't kn	don't kn	i have t	na	yes	yes	don't kn	take the	yes	yes	99	yes	because	they’re	availabi	my husba	nothing	financia	no one	female	35	3	christia	jss/midd	ga-dangm	married	trader	3
yes	yes	yes	no	yes	NA	to help	NA	same day	3 days	don't kn	don't kn	don't kn	don't kn	to help	na	yes	yes	don't kn	don't kn	na	na	88	yes	because	they’re	availabi	my husba	nothing	financia	no one	female	22	1	christia	jss/midd	ga-dangm	married	trader	1
yes	yes	yes	no	yes	NA	to help	NA	same day	4 days	don't kn	don't kn	don't kn	don't kn	to help	na	yes	no	na	na	na	na	88	yes	because	they’re	availabi	my husba	money wi	financia	no one	female	23	1	christia	jss/midd	ga-dangm	married	trader	1
yes	yes	yes	no	yes	NA	to help	NA	same day	same day	don't kn	don't kn	no	no	to help	na	yes	yes	no	take the	yes	yes	88	yes	because	they’re	availabi	myself	nothing	financia	no one	female	23	2	christia	jss/midd	akan	married	trader	1
yes	yes	yes	no	yes	NA	to help	NA	same day	next day	no	no	no	no	i have t	na	yes	no	na	na	na	na	88	yes	because	they’re	availabi	my husba	nothing	financia	no one	female	30	3	christia	jss/midd	ewe	married	trader	2
no	no	yes	no	yes	NA	to help	NA	same day	next day	no	no	don't kn	don't kn	no money	na	yes	no	na	na	na	na	88	yes	because	they’re	availabi	my husba	nothing	financia	no one	female	29	3	christia	jss/midd	ewe	married	trader	2
yes	no	yes	no	yes	NA	to help	NA	same day	next day	no	no	no	no	i have t	financia	yes	yes	yes	take the	yes	yes	99	yes	because	they’re	availabi	my husba	nothing	nothing	no one	female	40	5	christia	jss/midd	ewe	married	trader	3
yes	no	yes	no	yes	NA	to help	NA	same day	next day	no	no	no	no	i have t	na	yes	yes	yes	take the	yes	yes	99	yes	because	prompt t	availabi	my husba	nothing	financia	no one	female	40	5	christia	jss/midd	ewe	married	trader	3
yes	yes	yes	no	yes	NA	to help	NA	same day	next day	no	no	no	no	that is	to see i	yes	no	na	na	na	na	88	yes	new drug	they’re	proximit	my husba	nothing	financia	no one	female	35	3	christia	jss/midd	ga-dangm	married	artisan	3
yes	yes	yes	no	yes	NA	to help	NA	same day	2 days	don't kn	don't kn	don't kn	don't kn	i have t	na	yes	yes	yes	take the	yes	yes	99	yes	because	they’re	availabi	my husba	nothing	financia	no one	female	26	1	christia	jss/midd	ga-dangm	married	artisan	2
yes	yes	yes	no	yes	NA	to help	NA	same day	same day	no	no	no	no	to help	na	yes	no	na	na	na	na	88	yes	because	prompt t	availabi	my husba	nothing	financia	no one	female	32	6	christia	jss/midd	ewe	married	artisan	2
yes	no	yes	no	yes	NA	to help	NA	next day	next day	don't kn	don't kn	don't kn	don't kn	to help	na	yes	no	na	na	na	na	88	yes	because	they’re	availabi	grand pa	nothing	financia	no one	female	25	2	christia	jss/midd	ewe	married	artisan	2
yes	no	yes	no	yes	NA	to help	NA	same day	3 days	don't kn	don't kn	don't kn	don't kn	to help	na	yes	no	na	na	na	na	88	yes	because	proximit	availabi	my husba	nothing	nothing	no one	female	29	2	christia	jss/midd	ewe	married	artisan	2
yes	yes	yes	no	yes	NA	to help	NA	same day	did not	no	yes	don't kn	don't kn	child’s	na	yes	no	na	na	na	na	88	yes	new drug	they’re	availabi	my husba	nothing	nothing	no one	female	24	2	christia	jss/midd	ga-dangm	married	artisan	1
yes	no	yes	no	yes	NA	to help	NA	same day	same day	don't kn	don't kn	don't kn	don't kn	that is	to see i	no	no	na	na	na	na	88	yes	previous	they’re	proximit	my husba	nothing	financia	no one	female	35	4	christia	jss/midd	ga-dangm	married	artisan	3
yes	no	no	no	no	NA	i have t	NA	same day	next day	no	no	no	no	i have t	na	no	yes	don't kn	don't kn	don't kn	na	88	yes	new drug	they’re	proximit	my husba	nothing	financia	no one	female	29	1	christia	jss/midd	akan	married	artisan	2
yes	yes	yes	no	no	NA	i have t	NA	same day	4 days	no	no	no	no	that is	na	yes	no	na	na	na	na	88	yes	new drug	proximit	proximit	my husba	nothing	if i am	no one	female	27	3	christia	jss/midd	ewe	married	artisan	2
yes	yes	yes	no	no	NA	don’t kn	NA	same day	same day	no	no	no	no	to help	na	no	yes	don't kn	don't kn	don't kn	na	88	yes	new drug	they’re	availabi	my husba	nothing	financia	no one	female	48	8	christia	jss/midd	ga-dangm	married	artisan	4
no	no	yes	no	yes	NA	to help	NA	same day	next day	don't kn	don't kn	don't kn	don't kn	i have t	to see i	yes	yes	don't kn	don't kn	don't kn	na	88	yes	(others)	they’re	proximit	my husba	nothing	financia	no one	female	38	3	christia	jss/midd	akan	married	trader	3
yes	no	yes	no	yes	NA	to help	NA	same day	next day	don't kn	don't kn	no	no	to help	na	yes	yes	don't kn	take the	yes	yes	99	yes	because	prompt t	availabi	grand pa	nothing	financia	no one	female	22	1	christia	secondar	ga-dangm	seperate	unemploy	1
yes	yes	yes	no	yes	NA	don’t kn	NA	same day	same day	no	no	don't kn	don't kn	i have t	na	no	yes	don't kn	don't kn	don't kn	na	88	yes	new drug	they’re	proximit	grand pa	nothing	financia	no one	female	20	4	christia	secondar	ga-dangm	never m	unemploy	1
no	no	no	no	yes	NA	to help	NA	same day	next day	no	no	no	no	that is	na	no	no	na	na	na	na	88	no	because	they’re	availabi	my husba	nothing	financia	no one	female	21	1	christia	secondar	ga-dangm	married	unemploy	1
no	no	yes	no	yes	NA	to help	NA	same day	next day	no	yes	no	yes	i have t	to see i	yes	yes	don't kn	don't kn	don't kn	na	88	yes	new drug	proximit	proximit	my husba	nothing	nothing	no one	female	23	1	christia	secondar	ewe	married	unemploy	1
yes	yes	yes	no	yes	NA	to help	NA	same day	3 days	no	no	don't kn	don't kn	i have t	to see i	no	yes	no	take the	yes	yes	99	yes	because	prompt t	proximit	my husba	if the d	if i am	no one	female	27	2	christia	secondar	ga-dangm	married	farmer	2
yes	yes	yes	no	yes	NA	to help	NA	same day	next day	don't kn	don't kn	don't kn	don't kn	that is	to see i	yes	yes	no	take the	yes	yes	99	yes	new drug	reduce c	proximit	other re	nothing	if the d	no one	male	32	3	christia	secondar	ga-dangm	married	farmer	2
yes	no	no	no	no	NA	to help	NA	same day		no	no	no	no	don’t kn	financia	no	no	na	na	na	na	88	yes	new drug	prompt t	proximit	other re	nothing	nothing	no one	female	40	3	christia	secondar	ga-dangm	married	farmer	3
yes	yes	yes	no	yes	NA	to help	NA	same day	next day	no	no	no	no	that is	i notice	yes	no	na	na	na	na	88	yes	because	they’re	availabi	my husba	nothing	financia	no one	female	30	2	christia	secondar	ga-dangm	married	farmer	2
no	no	no	no	yes	NA	to help	NA	same day	next day	don't kn	don't kn	don't kn	don't kn	to help	to see i	no	no	na	na	na	na	88	yes	new drug	prompt t	proximit	my husba	if the d	if distr	no one	female	28	1	christia	secondar	ewe	married	farmer	2
yes	no	yes	no	no	NA	that is	NA	same day	did not	don't kn	don't kn	don't kn	don't kn	child’s	na	no	no	na	na	na	na	88	yes	because	they’re	availabi	my husba	nothing	nothing	no one	male	32	3	christia	secondar	ga-dangm	married	artisan	2
no	no	yes	no	yes	NA	to help	NA	same day	same day	no	no	no	no	to help	na	no	yes	no	take the	yes	yes	99	yes	because	they’re	proximit	other re	if the d	if distr	no one	female	32	2	christia	secondar	ga-dangm	married	trader	2
no	no	no	no	yes	NA	to help	NA	same day	3 days	no	no	no	no	i have t	to see i	no	yes	don't kn	don't kn	don't kn	na	88	yes	new drug	they’re	proximit	other re	if the d	if distr	no one	female	21	1	christia	secondar	ga-dangm	married	trader	1
yes	no	yes	no	yes	NA	to help	NA	same day	did not	no	no	no	no	that is	to see i	no	no	na	na	na	na	88	yes	new drug	prompt t	availabi	my husba	nothing	nothing	no one	female	30	5	christia	secondar	ga-dangm	married	trader	2
yes	yes	no	no	yes	NA	to help	NA	same day	3 days	no	no	no	no	that is	to see i	no	yes	yes	take the	yes	yes	99	yes	new drug	proximit	proximit	other re	nothing	if i am	no one	female	28	3	christia	secondar	ewe	married	trader	2
no	no	yes	no	yes	NA	to help	NA	same day	next day	no	no	yes	no	i have t	financia	yes	yes	don't kn	don't kn	yes	yes	99	yes	new drug	they’re	availabi	my husba	money wi	financia	no one	female	24	2	christia	secondar	ewe	married	trader	1
yes	no	no	no	no	NA	to help	NA	same day	next day	no	no	no	no	that is	to see i	yes	yes	don't kn	take the	yes	yes	99	yes	because	prompt t	proximit	my husba	nothing	nothing	no one	female	28	1	christia	secondar	ga-dangm	married	artisan	2
yes	yes	yes	no	no	NA	to help	NA	same day	3 days	don't kn	don't kn	don't kn	don't kn	i have t	na	yes	no	na	na	na	na	88	yes	because	prompt t	proximit	my husba	nothing	nothing	no one	female	26	3	christia	secondar	ga-dangm	married	artisan	2
no	no	yes	no	yes	NA	to help	NA	same day	next day	no	no	no	no	that is	na	no	yes	no	take the	yes	yes	99	yes	new drug	reduce c	proximit	my husba	nothing	if i am	no one	male	33	2	christia	secondar	ga-dangm	married	other	2
yes	no	yes	no	yes	NA	to help	NA	same day	3 days	no	no	no	no	to help	na	yes	yes	no	take the	yes	yes	99	yes	because	they’re	availabi	my husba	nothing	financia	no one	female	30	3	christia	secondar	ga-dangm	married	trader	2
yes	no	no	no	yes	NA	to help	NA	same day	3 days	no	no	no	no	i have t	na	yes	yes	no	take the	yes	yes	99	yes	because	they’re	availabi	my husba	nothing	financia	no one	female	32	3	christia	secondar	ewe	married	artisan	2
yes	no	no	no	yes	NA	others	NA	same day	next day	no	no	no	no	to help	na	no	yes	no	take the	yes	yes	99	yes	new drug	they’re	availabi	myself	money wi	nothing	no one	female	39	5	christia	vocation	ga-dangm	married	trader	3
no	yes	yes	no	yes	NA	to help	NA	same day	same day	don't kn	don't kn	don't kn	don't kn	to help	na	no	yes	yes	take the	yes	yes	88	yes	because	prompt t	availabi	myself	nothing	financia	no one	male	32	2	christia	vocation	akan	married	civil se	2
yes	yes	no	no	yes	NA	to help	NA	same day	same day	don't kn	don't kn	no	no	to help	na	yes	no	na	na	na	na	88	yes	because	they’re	availabi	my husba	nothing	financia	no one	female	26	2	christia	vocation	ga-dangm	married	artisan	2
no	no	no	no	yes	NA	to help	NA	same day	next day	no	no	no	no	i have t	to see i	no	yes	no	don't kn	yes	yes	99	yes	new drug	prompt t	proximit	other re	if the d	if the d	no one	female	26	1	christia	tertiary	ga-dangm	married	artisan	2
yes	yes	yes	no	no	NA	to help	NA	same day	3 days	don't kn	don't kn	don't kn	don't kn	don’t kn	na	yes	yes	no	don't kn	yes	don't kn	KPEKPE HIO	yes	because	they’re	proximit	landlord	money wi	if distr	no one	female	38	4	christia	tertiary	ewe	married	artisan	3
no	no	no	no	yes	NA	to help	NA	same day	next day	no	no	don't kn	don't kn	that is	to see i	yes	yes	no	take the	yes	yes	99	yes	new drug	they’re	proximit	my husba	if the d	if the d	neighbou	female	33	2	christia	tertiary	ewe	married	trader	2
no	no	yes	no	yes	NA	to help	NA	same day	same day	no	no	no	no	that is	na	yes	yes	no	take the	yes	yes	99	yes	new drug	they’re	proximit	other re	nothing	if distr	no one	male	44	5	missing	tertiary	ewe	married	civil se	3
yes	no	no	no	yes	NA	to help	NA	same day	next day	don't kn	don't kn	don't kn	don't kn	to help	na	no	yes	no	take the	don't kn	na	88	yes	it will	proximit	proximit	my husba	if the d	(other)	anyone w	male	45	5	christia	tertiary	ewe	married	civil se	4
no	no	yes	no	yes	NA	to help	NA	same day	next day	no	no	no	no	that is	financia	no	no	na	na	na	na	88	yes	because	they’re	availabi	my husba	nothing	nothing	no one	female	34	4	christia	tertiary	ewe	married	civil se	2
no	no	no	no	yes	NA	to help	NA	same day	next day	no	no	no	no	that is	na	no	yes	no	don't kn	don't kn	na	88	no	because	they’re	proximit	my husba	nothing	nothing	no one	male	61	4	christia	tertiary	ga-dangm	married	other	5
no	no	no	no	yes	NA	to help	NA	same day	next day	no	no	no	no	that is	i notice	no	yes	no	take the	yes	yes	KASA YEM HIO	yes	because	they’re	proximit	my husba	if the d	dirty en	anyone w	female	40	1	christia	tertiary	ga-dangm	never m	other	3
no	no	no	no	no	NA	to help	NA	same day	next day	don't kn	don't kn	don't kn	don't kn	that is	to see i	no	yes	no	take the	yes	yes	KUGMO KUGMO	yes	because	reduce c	proximit	my husba	if the d	financia	no one	male	73	10	christia	tertiary	ga-dangm	married	other	5
no	yes	no	no	yes	NA	to help	NA	same day	next day	no	no	no	no	i have t	to see i	no	yes	don't kn	don't kn	don't kn	na	88	yes	new drug	they’re	proximit	my husba	nothing	financia	no one	female	30	2	christia	tertiary	ga-dangm	married	other	2
no	no	no	no	yes	NA	to help	NA	same day	next day	no	no	no	no	that is	to see i	no	yes	no	take the	yes	yes	99	no	(others)	prompt t	proximit	other re	if there	if distr	family/a	female	40	3	christia	tertiary	ewe	married	civil se	3
yes	yes	yes	no	no	NA	to help	NA	same day	same day	no	yes	no	no	i have t	na	yes	yes	yes	take the	yes	yes	99	no	because	they’re	availabi	myself	money wi	financia	myself	male	59	7	christia	secondar	ga-dangm	married	other	5
